# Supplementary material for: Beyond fitness tracking: The use of consumer-grade wearable data from normal volunteers in cardiovascular and lipidomics research
Source: PLoS Biol. 2018 Feb 27;16(2):e2004285. doi: 10.1371/journal.pbio.2004285 (PMC5828350; doi:10.1371/journal.pbio.2004285)
Supplement: S1 Data — (XLSX) [file pbio.2004285.s004.xlsx]

## Sheet: S1 Data
S1 Data: Characteristics of study participants
Identifier	Race	Gender	Age	Age (Binned)	Smoking_History	Smoking_Packs	Smoking_Duration	Job_Type	Last.Week.Hrs.Spent.On.Physical.Exercise	Last.Week.Hrs.Spent.On.Cycling	Last.Week.Hrs.Spent.On.Walking	Last.Week.Hrs.Spent.On.Housework	Last.Week.Hrs.Spent.On.DIY	Walking.Pace	Last.Week.Hrs.Spent.On.Walking (Coded)	Last.Week.Hrs.Spent.On.Physical.Exercise (Coded)	Last.Week.Hrs.Spent.On.Housework (Coded)	Job_Type (Coded)	GPPAQ Score	Exercise.Times.Weekly	Exercise.Minutes.Weekly	Self.Reported.Sleep.Hours.Daily	Exercise.Weekly	LVMass	LVEDV	RVEDV	Aorta.Flow.Forward	Waist.Circumference	Hip.Circumference	SBP	DBP	ECG_HR	ABPM_HR	Height	Weight	BMI	HDL	LDL	TotalChol	Triglycerides	Glucose	RestingHR	NightHR	DayHR	DailySteps	DailySteps (x1000)	Steps_Categorical	NumDays_WithSteps	NumDays_Over20hrs
0115-0050-NHC	Malay	Male	65	(60,70]	Yes	1	35	Not employed	None	None	None	3 hours or more	None	Steady average pace	0	0	3	1	0	NA	NA	5	Never/hardly	70	84	94	NA	98	117	117	81	70	82	1.62	74.2	28.2731	1.16	5.77	7.98	2.32	5.7	78.8103	65.375	96.8182	7674.5	7.6745	CatII	2	2
0115-0066-NHC	Chinese	Male	48	(40,50]	No	NA	NA	Sedentary job	1 hour but less than 3 hours	None	1 hour but less than 3 hours	Some but less than 1 hour	None	Brisk pace	2	2	1	2	2	3	45	5	Often/always	91	116.5	139.4	68.78	79	90	127	82	76	78	1.63	64	24.0882	1.28	3.01	4.75	1.01	5.2	66.0797	59.0145	70.4615	11973.8	11.9738	CatIII	6	6
0115-0070-NHC	Chinese	Female	51	(50,60]	No	NA	NA	Sedentary job	1 hour but less than 3 hours	None	Some but less than 1 hour	None	None	Fast	1	2	0	2	2	2	60	8	Often/always	57	104	106	NA	76	93	115	73	60	66	1.62	54.8	20.881	1.54	4.6	6.6	1.02	5.3	67.3375	59.6667	72.0357	4999	4.999	CatI	6	5
0115-0074-NHC	Chinese	Female	41	(40,50]	No	NA	NA	Sedentary job	1 hour but less than 3 hours	None	None	None	None	Steady average pace	0	2	0	2	2	1	45	6	Often/always	76.2	116.6	130.1	69.87	74	92	135	89	76	67	1.72	67	22.6474	1.43	3.74	5.71	1.2	6.1	67.2949	62.625	75.4167	11272.3	11.2723	CatIII	4	3
0115-0075-NHC	Chinese	Male	50	(40,50]	No	NA	NA	Active job	Some but less than 1 hour	3 hours or more	1 hour but less than 3 hours	1 hour but less than 3 hours	None	Steady average pace	2	1	2	3	2	3	30	8	Often/always	96	177.2	171.2	101.3	95	100	129	76	54	65	1.81	85.5	26.0981	1.13	3.17	4.75	0.99	5.1	58.3526	51.8	65.88	11209.6	11.2096	CatIII	6	5
0115-0093-NHC	Chinese	Female	63	(60,70]	No	NA	NA	Active job	None	None	3 hours or more	3 hours or more	None	Steady average pace	3	0	3	3	1	NA	NA	7	Never/hardly	44.7	89.5	79.9	58.34	68	89	117	64	59	64	1.55	46.2	19.23	1.79	3.59	5.87	1.09	5.4	67.7671	65.9444	76.7692	7366.33	7.36633	CatII	4	3
0115-0105-NHC	Chinese	Male	26	(20,30]	Yes	1	5	Sedentary job	3 hours or more	None	3 hours or more	3 hours or more	None	Brisk pace	3	3	3	2	3	1	120	8	Never/hardly	NA	157.1	191	NA	104	108	118	74	50	72	1.81	91	27.7769	1.23	2.59	4.44	1.37	5	67.4051	71.2	77.5882	10002.5	10.0025	CatII	4	2
0116-0001-NHC	Chinese	Female	53	(50,60]	No	NA	NA	Active job	3 hours or more	Some but less than 1 hour	3 hours or more	3 hours or more	3 hours or more	Brisk pace	3	3	3	3	3	7	30	7	Often/always	63.7	110.1	108.9	73.34	78	95	137	84	52	75	1.63	61.5	23.1473	1.36	3.96	5.79	1.04	6	65.9662	56.2778	70.5	8142.5	8.1425	CatII	4	2
0116-0002-NHC	Chinese	Male	57	(50,60]	No	NA	NA	Not employed	1 hour but less than 3 hours	None	3 hours or more	None	3 hours or more	Brisk pace	3	2	0	1	2	5	30	6	Often/always	116.7	116.1	128.2	NA	120	130	163	81	60	117	1.74	96	31.7083	1.17	2.42	4.43	1.85	7.4	62.573	53.4792	68.7	7948.75	7.94875	CatII	4	4
0116-0003-NHC	Chinese	Male	55	(50,60]	No	NA	NA	Sedentary job	Some but less than 1 hour	3 hours or more	1 hour but less than 3 hours	1 hour but less than 3 hours	1 hour but less than 3 hours	Steady average pace	2	1	2	2	1	2	45	7	Often/always	78.6	118.3	120.2	65.99	80	91	132	82	70	77	1.74	58.4	19.2892	1.41	3.93	5.99	1.44	5.3	67.2528	63.75	71.8	5594.67	5.59467	CatI	4	3
0116-0004-NHC	Chinese	Female	57	(50,60]	No	NA	NA	Active job	Some but less than 1 hour	None	None	Some but less than 1 hour	None	Steady average pace	0	1	1	3	2	3	20	7	Often/always	51	89	88	56.9	94	99	152	100	63	79	1.53	62.7	26.7846	1.26	2.76	4.43	0.9	6.1	70.4596	64.9167	79.1	10502	10.502	CatIII	4	3
0116-0006-NHC	Indian	Female	36	(30,40]	No	NA	NA	Sedentary job	None	None	1 hour but less than 3 hours	Some but less than 1 hour	None	Steady average pace	2	0	1	2	0	2	60	6	Often/always	NA	103.2	95.2	58.96	100	120	143	100	78	102	1.69	82	28.7105	1.06	3.28	4.93	1.3	5.1	80.487	70.9583	92.3	7477	7.477	CatII	5	3
0116-0020-NHC	Chinese	Male	29	(20,30]	No	NA	NA	Sedentary job	3 hours or more	None	1 hour but less than 3 hours	None	None	Steady average pace	2	3	0	2	3	3	45	8	Often/always	103.7	143.5	162.2	81.27	119	123	157	100	60	75	1.76	90.4	29.1839	1.7	3.58	5.92	1.41	5.2	66.691	58.8298	74.6897	9353.25	9.35325	CatII	4	4
0116-0032-NHC	Chinese	Female	56	(50,60]	No	NA	NA	Sedentary job	1 hour but less than 3 hours	None	1 hour but less than 3 hours	3 hours or more	Some but less than 1 hour	Brisk pace	2	2	3	2	2	1	45	5	Often/always	63.2	94.6	94.3	58.52	86	94	142	99	68	80	1.48	53.6	24.4704	2.33	3.15	5.79	0.69	5.9	77.9735	67.1042	87.0976	11503	11.503	CatIII	5	3
0116-0033-NHC	Chinese	Male	54	(50,60]	No	NA	NA	Not employed	Some but less than 1 hour	None	1 hour but less than 3 hours	1 hour but less than 3 hours	1 hour but less than 3 hours	Steady average pace	2	1	2	1	1	2	45	6	Often/always	105.4	113.5	119.7	62.55	97	105	166	109	60	87	1.66	77.3	28.052	1.25	3.51	5.27	1.13	6.8	72.4757	58.7143	80.5833	8200.33	8.20033	CatII	5	3
0116-0037-NHC	Chinese	Female	50	(40,50]	Yes	1	25	Active job	None	None	1 hour but less than 3 hours	None	None	Steady average pace	2	0	0	3	1	NA	NA	6	Never/hardly	70.1	114.5	120.1	65.38	80	95	102	50	52	74	1.7	55.5	19.2042	1.56	3.36	5.46	1.19	4.9	65.7469	58.1	80.7143	9011	9.011	CatII	5	5
0116-0039-NHC	Chinese	Male	47	(40,50]	No	NA	NA	Sedentary job	Some but less than 1 hour	None	Some but less than 1 hour	Some but less than 1 hour	None	Brisk pace	1	1	1	2	1	5	15	8	Never/hardly	77.7	128	140.7	74.04	84	95	104	59	52	53	1.71	64.1	21.9213	1.03	2.26	3.58	0.64	5.6	73.4362	63.8194	79.7059	14494.2	14.4942	CatIII	7	6
0116-0043-NHC	Chinese	Male	45	(40,50]	Yes	1	Not Stated	Active job	1 hour but less than 3 hours	None	3 hours or more	1 hour but less than 3 hours	None	Brisk pace	3	2	2	3	3	1	30	6	Often/always	68.3	120.2	130.6	77	82	93	116	75	50	58	1.69	53.1	18.5918	1.32	4.23	5.87	0.7	5.6	67.8815	56.2558	76.4348	17334	17.334	CatIV	4	3
0116-0044-NHC	Chinese	Female	65	(60,70]	No	NA	NA	Not employed	None	None	3 hours or more	3 hours or more	None	Steady average pace	3	0	3	1	0	3	30	6	Often/always	66.9	107.2	108.6	66.06	91	88	135	85	62	67	1.63	62.8	23.6366	1.2	4.18	6.08	1.55	6.6	65.7188	60.7292	80.1765	11649	11.649	CatIII	4	4
0116-0045-NHC	Chinese	Male	67	(60,70]	No	NA	NA	Not employed	3 hours or more	None	3 hours or more	3 hours or more	None	Brisk pace	3	3	3	1	3	5	45	7	Often/always	61	111.1	124	70	110	112	148	85	80	60	1.77	85.6	27.3229	1.07	3.48	5	1	6.4	75.0082	64.1429	84.1667	7908.33	7.90833	CatII	5	3
0116-0047-NHC	Chinese	Female	66	(60,70]	No	NA	NA	Active job	1 hour but less than 3 hours	None	3 hours or more	Some but less than 1 hour	None	Steady average pace	3	2	1	3	3	5	30	5	Often/always	NA	105.4	84.9	56.6	80	92	155	79	87	80	1.46	41.1	19.2813	1.9	3.43	5.8	1.04	6	69.7	61.7419	70.4091	23811	23.811	CatIV	4	2
0116-0053-NHC	Chinese	Female	43	(40,50]	No	NA	NA	Sedentary job	None	None	Some but less than 1 hour	None	None	Fast	1	0	0	2	0	NA	NA	6	Never/hardly	49.8	99.4	108.2	59.8	83	87	104	63	61	80	1.59	46.5	18.3933	1.37	2.04	3.67	0.57	5.7	75.7344	63.6944	83.3077	15872	15.872	CatIII	4	3
0116-0054-NHC	Chinese	Female	47	(40,50]	No	NA	NA	Sedentary job	None	None	1 hour but less than 3 hours	None	None	Steady average pace	2	0	0	2	0	NA	NA	7	Never/hardly	37.7	82.1	83.7	59.11	72	90	104	69	68	74	1.53	53.7	22.94	2	3.44	5.83	0.85	5.1	75.1655	66.5167	80.5082	3830.5	3.8305	CatI	4	4
0116-0061-NHC	Chinese	Male	52	(50,60]	No	NA	NA	Sedentary job	None	Some but less than 1 hour	3 hours or more	1 hour but less than 3 hours	1 hour but less than 3 hours	Fast	3	0	2	2	0	1	30	5	Never/hardly	128.5	112.4	126.5	60	81	91	141	103	76	89	1.72	68	22.99	1.22	4.25	5.95	1.05	7.1	81.7808	68.25	92.381	9574	9.574	CatII	6	3
0116-0069-NHC	Chinese	Female	61	(60,70]	No	NA	NA	Sedentary job	None	None	Some but less than 1 hour	Some but less than 1 hour	None	Steady average pace	1	0	1	2	0	5	30	6	Often/always	63	80	75	50.3	66	85	120	65	63	68	1.56	46.5	19.11	1.52	3.88	5.93	1.16	5.3	69.7312	62.625	74.6875	8396.4	8.3964	CatII	5	5
0116-0070-NHC	Other	Female	24	(20,30]	No	NA	NA	Not employed	1 hour but less than 3 hours	None	1 hour but less than 3 hours	Some but less than 1 hour	Some but less than 1 hour	Steady average pace	2	2	1	1	2	5	50	5	Often/always	77	150	125	83	98	102	105	64	45	57	1.66	65.5	23.7698	1.29	3.32	5.06	0.99	5.6	58.242	51.2931	72.1429	8005.5	8.0055	CatII	5	4
0117-0019-NHC	Chinese	Male	33	(30,40]	No	NA	NA	Active job	1 hour but less than 3 hours	None	1 hour but less than 3 hours	Some but less than 1 hour	None	Brisk pace	2	2	1	3	3	3	60	8	Often/always	75	121	120	71	74	83	112	60	66	69	1.65	55.6	20.42	1.47	1.8	3.48	0.46	4.7	63.4631	55.6875	72.5294	11983.8	11.9838	CatIII	4	4
0117-0022-NHC	Chinese	Female	69	(60,70]	No	NA	NA	Active job	None	None	3 hours or more	3 hours or more	1 hour but less than 3 hours	Brisk pace	3	0	3	3	1	NA	NA	5	NA	44.3	99.8	NA	68.8	79	96	104	65	57	61	1.51	56.5	24.78	1.39	2.81	4.64	0.96	5.5	67.3054	54.5417	78.875	10761.5	10.7615	CatIII	5	4
0117-0034-NHC	Chinese	Female	45	(40,50]	No	1	30	Sedentary job	1 hour but less than 3 hours	1 hour but less than 3 hours	3 hours or more	1 hour but less than 3 hours	1 hour but less than 3 hours	Fast	3	2	2	2	2	14	60	4	Often/always	75.4	106.5	NA	63.4	85	100	134	90	76	68	1.52	68.5	29.65	1.14	3.08	5.29	2.36	4.9	80.2773	78.1389	81.0526	15246	15.246	CatIII	5	3
0117-0037-NHC	Chinese	Female	37	(30,40]	No	NA	NA	Active job	None	None	3 hours or more	None	None	Slow	3	0	0	3	1	NA	NA	7	Never/hardly	52.7	106.2	NA	65.9	65	88	105	68	69	79	1.62	54	20.58	1.62	3.63	5.62	0.81	5	76.5729	68.24	79.2105	10569	10.569	CatIII	6	2
0117-0045-NHC	Chinese	Male	24	(20,30]	No	99	99	Highly active job	Some but less than 1 hour	None	None	None	None	Steady average pace	0	1	0	4	3	2	30	7	Often/always	65	119	NA	75	82	93	114	70	67	73	1.62	58	22.1	1.43	4.16	6.08	1.08	5.4	62.8533	55.4167	77.625	14141.5	14.1415	CatIII	4	4
0117-0047-NHC	Chinese	Female	49	(40,50]	No	99	99	Active job	1 hour but less than 3 hours	Some but less than 1 hour	3 hours or more	1 hour but less than 3 hours	Some but less than 1 hour	Brisk pace	3	2	2	3	3	3	30	7	Often/always	73	133	NA	91.5	70	89	97	56	52	63	1.61	53.5	20.64	1.88	3.37	5.59	0.76	5.2	56.3115	47.65	63.2	13594.8	13.5948	CatIII	6	5
0215-0004-NHC	Chinese	Female	65	(60,70]	No	NA	NA	Highly active job	None	None	3 hours or more	1 hour but less than 3 hours	None	Steady average pace	3	0	2	4	2	NA	NA	6	Never/hardly	NA	91.4	99.2	48.43	76	89	141	83	69	75	1.52	48.3	20.91	2.37	3.87	6.58	0.76	5.4	68.9183	64.6667	74.0625	20721.6	20.7216	CatIV	6	5
0215-0007-NHC	Chinese	Female	65	(60,70]	No	NA	NA	Active job	None	None	3 hours or more	Some but less than 1 hour	None	Fast	3	0	1	3	1	3	90	6	Often/always	54.3	88.4	85.1	53.42	72	88	142	85	59	66	1.52	47.6	20.6	2.51	4.51	7.42	0.88	5.3	70.5525	61.4222	76.7241	9982.67	9.98267	CatII	4	3
0215-0011-NHC	Chinese	Female	45	(40,50]	No	NA	NA	Not employed	None	Some but less than 1 hour	Some but less than 1 hour	3 hours or more	None	Slow	1	0	3	1	0	NA	NA	5	Never/hardly	55.6	117.8	111.9	NA	78	97	127	73	70	90	1.64	63.3	23.5351	0.9	2.41	4.23	2.02	5.1	72.121	66.087	78.9714	7591	7.591	CatII	5	3
0215-0013-NHC	Chinese	Female	45	(40,50]	No	NA	NA	Sedentary job	None	None	1 hour but less than 3 hours	1 hour but less than 3 hours	None	Steady average pace	2	0	2	2	0	NA	NA	7	Never/hardly	55.9	116.7	119.2	67	68	74	115	68	58	67	1.66	60.1	21.8101	1.56	4.12	5.93	0.55	NA	64.2928	53.4583	68.5676	5515.5	5.5155	CatI	4	4
0215-0018-NHC	Chinese	Male	44	(40,50]	No	NA	NA	Sedentary job	3 hours or more	3 hours or more	3 hours or more	3 hours or more	None	Fast	3	3	3	2	3	5	40	7	Often/always	95.2	139.7	149.2	88.38	90	99	125	78	62	76	1.81	82.4	25.1519	1.07	3.5	5.4	1.83	5.6	67.0048	55.8056	74.2143	16643.3	16.6433	CatIV	4	3
0215-0033-NHC	Chinese	Female	54	(50,60]	No	NA	NA	Active job	None	None	3 hours or more	None	None	Steady average pace	3	0	0	3	1	NA	NA	6	Never/hardly	64.3	87.9	98.2	62.07	72	95	115	74	73	74	1.62	58.3	22.21	2.64	4.16	7.15	0.77	5.6	69.2123	64.1875	71.7778	8580.33	8.58033	CatII	4	3
0215-0037-NHC	Chinese	Male	40	(30,40]	No	NA	NA	Sedentary job	3 hours or more	None	3 hours or more	3 hours or more	None	Steady average pace	3	3	3	2	3	3	30	7	Often/always	103.9	154.8	185	92	80	98	150	89	70	89	1.72	75.8	25.622	1.55	3.61	5.41	0.56	5.4	72.5536	61.3134	76.9178	10609.4	10.6094	CatIII	6	5
0215-0045-NHC	Other	Female	43	(40,50]	No	NA	NA	Active job	3 hours or more	1 hour but less than 3 hours	3 hours or more	3 hours or more	None	Steady average pace	3	3	3	3	3	NA	NA	8	NA	85.4	107.2	112.4	66.1	66	90	130	85	67	82	1.55	50.8	21.1446	2.21	3.25	5.65	0.41	4.6	65.1167	57.9143	83.1538	16764.8	16.7647	CatIV	4	4
0216-0002-NHC	Chinese	Male	49	(40,50]	No	NA	NA	Sedentary job	Some but less than 1 hour	None	Some but less than 1 hour	1 hour but less than 3 hours	1 hour but less than 3 hours	Steady average pace	1	1	2	2	1	2	45	6	Never/hardly	83	119	134	65.2	85	96	107	68	62	78	1.69	63.3	22.1631	1.44	3.38	5.36	1.2	6	74.4588	61.3889	82.3	10667.3	10.6673	CatIII	3	3
0216-0003-NHC	Chinese	Female	46	(40,50]	No	NA	NA	Active job	None	None	3 hours or more	1 hour but less than 3 hours	None	Steady average pace	3	0	2	3	1	2	45	6	Often/always	80	115	110	67.5	90	107	135	90	86	101	1.53	60.1	25.6739	1.14	1.92	3.59	1.16	5.5	79.2275	71.6667	90	14260.7	14.2607	CatIII	3	3
0216-0008-NHC	Chinese	Male	45	(40,50]	No	NA	NA	Sedentary job	None	Some but less than 1 hour	1 hour but less than 3 hours	Some but less than 1 hour	None	Slow	2	0	1	2	0	4	60	6	Often/always	120.5	149.2	162.6	83.72	92	100	141	102	65	70	1.83	80.9	24.16	2.17	2.32	4.73	0.54	5.2	72.8986	66.1613	87.4615	17420.3	17.4203	CatIV	3	3
0216-0010-NHC	Chinese	Male	64	(60,70]	No	NA	NA	Not employed	None	None	Some but less than 1 hour	Some but less than 1 hour	None	Brisk pace	1	0	1	1	0	3	60	6	Often/always	60	133	NA	78.5	86	93	145	87	56	80	1.66	65.6	23.81	0.97	2.5	4.31	1.85	4.8	68.6967	58.5932	72.9348	6605.4	6.6054	CatI	5	5
0216-0051-NHC	Chinese	Male	47	(40,50]	No	NA	NA	Sedentary job	None	3 hours or more	None	None	None	Steady average pace	0	0	0	2	0	2	200	7	Often/always	137	117	NA	63	120	126	178	105	90	101	1.76	123.3	39.805	2.06	2.2	4.65	0.85	5	77.3006	71.3833	80.2344	6740.25	6.74025	CatII	9	4
0217-0002-NHC	Chinese	Male	44	(40,50]	No	99	99	Sedentary job	1 hour but less than 3 hours	None	3 hours or more	Some but less than 1 hour	None	Fast	3	2	1	2	2	1	60	7	Often/always	60.1	94.7	113.9	57.76	73	87	109	81	76	92	1.62	55.1	21	1.73	4.42	6.57	0.92	5.1	68.5118	60.4583	74.2778	12346	12.346	CatIII	5	4
0217-0026-NHC	Chinese	Male	59	(50,60]	No	99	99	Active job	3 hours or more	Some but less than 1 hour	3 hours or more	None	Some but less than 1 hour	Brisk pace	3	3	0	3	3	2	120	7	Often/always	78.9	111.2	124.6	66.92	87	97	139	85	78	74	1.66	67.3	24.42	1.43	3.24	5.7	2.27	5.7	69.9562	63.9762	75	9983.25	9.98325	CatII	4	4
0217-0034-NHC	Chinese	Female	42	(40,50]	No	99	99	Active job	None	None	3 hours or more	None	None	Fast	3	0	0	3	1	1	60	7	Often/always	72.1	103	97.3	64.22	67	84	110	62	75	84	1.54	43.2	18.22	1.35	2.13	3.87	0.85	5	73.6012	62.4167	78.8214	9653.25	9.65325	CatII	6	4
0217-0037-NHC	Chinese	Female	27	(20,30]	No	99	99	Active job	1 hour but less than 3 hours	Some but less than 1 hour	3 hours or more	None	Some but less than 1 hour	Steady average pace	3	2	0	3	3	1	45	6	Often/always	64	137	NA	81.9	72	107	101	66	57	66	1.65	64.1	23.54	1.51	2.46	4.16	0.43	5.1	67.2135	55.2167	78.65	7737.5	7.7375	CatII	6	4
0217-0038-NHC	Chinese	Female	34	(30,40]	No	NA	NA	Active job	None	None	3 hours or more	3 hours or more	None	Steady average pace	3	0	3	3	1	NA	NA	4	Never/hardly	73.02	107.1	122.1	68.3	79	94	100	56	NA	71	1.55	62.1	25.85	1.32	3.68	5.32	0.7	5.3	80.9789	73.0426	87.2632	13871	13.871	CatIII	5	4
0315-0061-NHC	Indian	Male	59	(50,60]	No	NA	NA	Active job	1 hour but less than 3 hours	None	None	None	None	Fast	0	2	0	3	3	2	120	8	Often/always	103.2	148	168.2	86.2	91	103	142	86	46	60	1.79	77.6	24.219	1.13	3.82	5.86	2	5	62.5197	55.2857	68.6176	8381.67	8.38167	CatII	4	3
0315-0073-NHC	Chinese	Female	61	(60,70]	No	NA	NA	Not employed	None	None	1 hour but less than 3 hours	Some but less than 1 hour	None	Steady average pace	2	0	1	1	0	2	300	6	Often/always	55.7	83.9	115.4	53	70	88	121	72	60	76	1.49	46.1	20.7648	1.84	3.64	5.85	0.82	5.1	77.0139	68.4583	81.5143	15328.3	15.3283	CatIII	3	3
0315-0074-NHC	Chinese	Female	53	(50,60]	No	NA	NA	Sedentary job	None	None	1 hour but less than 3 hours	None	None	Steady average pace	2	0	0	2	0	NA	NA	7	Never/hardly	98.8	106.4	115.7	69.01	80	97	138	72	71	85	1.59	60.5	23.931	1.65	3.72	5.79	0.92	5.3	90.8381	82.7872	100.511	6712	6.712	CatII	5	3
0315-0076-NHC	Chinese	Female	55	(50,60]	No	NA	NA	Not employed	3 hours or more	None	3 hours or more	None	None	Steady average pace	3	3	0	1	3	1	120	6	Never/hardly	79.9	102.9	90.5	64.7	80	99	156	99	62	68	1.54	65.2	27.492	1.48	3.84	5.76	0.97	4.9	65.4023	58.2	72.8235	7190.25	7.19025	CatII	4	4
0315-0105-NHC	Chinese	Male	37	(30,40]	No	NA	NA	Active job	None	None	Some but less than 1 hour	None	None	Fast	1	0	0	3	1	NA	NA	7	Never/hardly	NA	161.4	168.6	NA	88	98	147	91	63	94	1.76	73.2	23.6312	0.92	3.95	5.73	1.9	6.2	68.7907	54.0833	74.2222	8431.67	8.43167	CatII	3	3
0316-0005-NHC	Chinese	Female	41	(40,50]	No	NA	NA	Sedentary job	None	None	3 hours or more	None	None	Steady average pace	3	0	0	2	0	1	20	8	Often/always	NA	91.4	87.3	55	88	90	115	54	69	72	1.52	55	23.8054	1.41	4.12	6.18	1.44	5.1	76.0809	65.8056	79.5667	8905.33	8.90533	CatII	4	3
0316-0015-NHC	Chinese	Male	42	(40,50]	No	NA	NA	Sedentary job	1 hour but less than 3 hours	None	1 hour but less than 3 hours	3 hours or more	None	Steady average pace	2	2	3	2	2	3	40	7	Often/always	92.2	155.5	NA	96.9	92	105	116	77	50	67	1.76	74.5	24.05	1.08	3.42	5.06	1.24	5.4	59.9298	48.8056	69.12	11946.4	11.9464	CatIII	7	5
0316-0016-NHC	Chinese	Male	57	(50,60]	No	NA	NA	Sedentary job	1 hour but less than 3 hours	None	3 hours or more	None	None	Fast	3	2	0	2	2	2	35	7	Often/always	58	136.5	NA	70.4	88	90	108	65	43	59	1.72	55.6	18.79	2.42	3.74	6.63	1.03	4.8	58.107	50.9444	62.5294	9453	9.453	CatII	5	2
0316-0044-NHC	Chinese	Female	47	(40,50]	No	NA	NA	Not employed	None	None	3 hours or more	None	Some but less than 1 hour	Steady average pace	3	0	0	1	0	7	30	7	Often/always	NA	111.6	119.9	71	69	93	107	68	54	66	1.58	56.7	22.71	1.33	2.05	3.86	1.06	5.7	72.6281	63.5	77.2692	11560.3	11.5603	CatIII	3	3
0316-0058-NHC	Chinese	Female	27	(20,30]	No	NA	NA	Sedentary job	1 hour but less than 3 hours	None	1 hour but less than 3 hours	1 hour but less than 3 hours	None	Slow	2	2	2	2	2	8	60	7	Often/always	62.4	122	127	68.4	72	94	108	68	53	68	1.58	50.2	20.11	1.64	3.26	5.14	0.54	5.2	61.9043	51.8333	66.2619	9193.25	9.19325	CatII	6	4
0316-0061-NHC	Chinese	Female	50	(40,50]	No	NA	NA	Not employed	None	None	3 hours or more	3 hours or more	None	Fast	3	0	3	1	0	NA	NA	3	Never/hardly	NA	99	NA	61.5	70	90	126	82	57	83	1.63	54	20.3244	2.58	3.57	6.46	0.69	5.1	71.7106	59.7759	81.3208	8872	8.872	CatII	3	3
0316-0073-NHC	Chinese	Male	41	(40,50]	No	NA	NA	Sedentary job	None	None	Some but less than 1 hour	Some but less than 1 hour	None	Steady average pace	1	0	1	2	0	0	0	6	Never/hardly	102	141	NA	70	105	114	129	82	75	79	1.79	95.9	29.93	0.94	2.91	4.26	0.91	6.4	76.8704	68.8833	86.4667	6311.75	6.31175	CatI	6	4
0316-0080-NHC	Indian	Female	60	(50,60]	No	NA	NA	Active job	None	None	None	None	None	Brisk pace	0	0	0	3	1	2	90	8	Often/always	NA	101.5	84	52.8	86	91	131	67	50	72	1.68	55.2	19.56	1.61	3.77	5.97	1.31	5.6	65.9331	55.1389	73.0968	6983.33	6.98333	CatII	4	3
0415-0001-NHC	Chinese	Female	60	(50,60]	No	NA	NA	Sedentary job	None	None	1 hour but less than 3 hours	Some but less than 1 hour	None	Steady average pace	2	0	1	2	0	5	15	7	Often/always	51.2	85.1	87.7	64.6	68	91	148	69	68	58	1.55	50.7	21.103	1.72	3.26	5.27	0.64	4.7	68.5463	76.3125	81.12	9492.67	9.49267	CatII	4	3
0415-0005-NHC	Chinese	Male	56	(50,60]	No	NA	NA	Sedentary job	None	None	1 hour but less than 3 hours	Some but less than 1 hour	None	Steady average pace	2	0	1	2	0	1	30	8	Often/always	94.4	134.9	144.2	60.4	86	97	164	105	85	84	1.76	65.9	21.2745	1.25	3.65	6.6	3.75	7.4	72.8756	63.3333	79.1489	5578.33	5.57833	CatI	3	3
0415-0033-NHC	Chinese	Female	41	(40,50]	No	NA	NA	Not employed	None	None	3 hours or more	1 hour but less than 3 hours	None	Steady average pace	3	0	2	1	0	NA	NA	7	Never/hardly	NA	100.2	124	NA	66	96	112	50	51	69	1.59	51.8	20.4897	1.9	2.38	4.5	0.48	5	62.1941	50.9333	71.8462	9554.25	9.55425	CatII	6	4
0415-0039-NHC	Chinese	Female	45	(40,50]	No	NA	NA	Sedentary job	None	None	1 hour but less than 3 hours	1 hour but less than 3 hours	Some but less than 1 hour	Brisk pace	2	0	2	2	0	3	30	6	Never/hardly	66.6	102	118.8	66.9	92	105	122	69	66	96	1.58	69.6	27.8801	1.55	3.54	5.56	1.04	5.2	76.545	65.75	81.0333	13108	13.108	CatIII	4	3
0415-0046-NHC	Chinese	Female	47	(40,50]	No	NA	NA	Sedentary job	3 hours or more	None	1 hour but less than 3 hours	3 hours or more	None	Brisk pace	2	3	3	2	3	2	40	5	Often/always	71.5	116	132.2	79.11	80	103	132	77	59	66	1.66	74	26.8544	1.39	2.92	4.6	0.63	5.7	63.4473	56.7241	66.5	10457	10.457	CatIII	5	3
0415-0049-NHC	Chinese	Female	35	(30,40]	No	NA	NA	Sedentary job	None	None	1 hour but less than 3 hours	1 hour but less than 3 hours	None	Fast	2	0	2	2	0	NA	NA	6	Never/hardly	58.7	109.5	119.6	70.4	74	94	101	64	52	83	1.6	54	21.0938	1.74	3.93	5.88	0.46	4.8	67.7101	64.8235	69.75	13120.7	13.1207	CatIII	4	3
0415-0065-NHC	Chinese	Male	36	(30,40]	No	NA	NA	Sedentary job	1 hour but less than 3 hours	Some but less than 1 hour	1 hour but less than 3 hours	1 hour but less than 3 hours	None	Steady average pace	2	2	2	2	2	4	60	6	Often/always	104.9	120.9	166.9	71.8	83	87	125	83	52	70	1.65	65.1	23.9118	2.26	2.73	5.26	0.59	5.2	65.1457	54.55	71.3293	14840.7	14.8407	CatIII	7	6
0415-0066-NHC	Chinese	Male	52	(50,60]	No	NA	NA	Highly active job	None	None	1 hour but less than 3 hours	None	None	Steady average pace	2	0	0	4	2	4	60	6	Often/always	102.2	104	157.2	74.1	86	97	157	86	57	94	1.71	77.6	26.5381	1.19	2.76	4.31	0.8	5.5	65.5677	62.0222	65.5	11968	11.968	CatIII	5	4
0415-0078-NHC	Other	Male	38	(30,40]	No	NA	NA	Active job	1 hour but less than 3 hours	Some but less than 1 hour	Some but less than 1 hour	None	Some but less than 1 hour	Steady average pace	1	2	0	3	3	NA	NA	4	Never/hardly	166.3	186.6	184	85.36	123	120	161	105	84	78	1.7	119.6	41.38	1.01	3.28	5.36	2.36	6.5	82.6768	78.0833	79.1176	8497	8.497	CatII	4	2
0415-0092-NHC	Chinese	Male	23	(20,30]	No	NA	NA	Active job	None	None	3 hours or more	1 hour but less than 3 hours	Some but less than 1 hour	Fast	3	0	2	3	1	NA	NA	7	Never/hardly	79	147.5	144.3	72.39	83	85	124	63	52	81	1.62	58.1	22.1384	2.34	2.16	4.84	0.74	5.5	74.0973	60.6585	83.4407	10083	10.083	CatII	6	4
0416-0009-NHC	Chinese	Male	23	(20,30]	No	NA	NA	Active job	1 hour but less than 3 hours	None	1 hour but less than 3 hours	Some but less than 1 hour	None	Steady average pace	2	2	1	3	3	2	40	8	Often/always	110	142.8	NA	82.4	80	95	121	83	54	63	1.61	60.8	23.4559	1.04	3.42	4.95	1.07	5.4	74.1503	77.5556	74.1923	16166	16.166	CatIV	4	2
0416-0040-NHC	Chinese	Female	52	(50,60]	No	NA	NA	Sedentary job	3 hours or more	None	3 hours or more	3 hours or more	3 hours or more	Steady average pace	3	3	3	2	3	3	60	6	Often/always	83	118	130	66	93	105	121	62	54	63	1.68	68.2	24.1638	1.56	3.83	5.66	0.59	4.6	61.4836	56.3542	63.1579	13579.7	13.5797	CatIII	5	3
0416-0047-NHC	Chinese	Female	58	(50,60]	No	NA	NA	Active job	3 hours or more	None	3 hours or more	3 hours or more	None	Brisk pace	3	3	3	3	3	4	30	7	Often/always	68.2	99	NA	61	74	88	123	83	51	51	1.56	50.2	20.6279	1.94	4.22	6.5	0.75	5.4	58.6199	49.7083	63	11001	11.001	CatIII	5	3
0416-0048-NHC	Chinese	Female	54	(50,60]	No	NA	NA	Active job	None	None	3 hours or more	3 hours or more	None	Steady average pace	3	0	3	3	1	NA	NA	NA	NA	72	134.1	NA	80.4	78	96	119	68	NA	76	1.65	60	22.0386	1.31	2.73	4.38	0.76	4.8	60.5545	51.0833	69.7419	9873	9.873	CatII	4	3
0416-0049-NHC	Chinese	Male	59	(50,60]	No	NA	NA	Not employed	3 hours or more	None	3 hours or more	3 hours or more	None	Fast	3	3	3	1	3	4	60	7	Often/always	122	155.5	NA	83.1	88	90	145	82	54	47	1.72	63.1	21.3291	1.42	3.85	5.54	0.59	5	59.5534	50.506	65.1296	11515.2	11.5152	CatIII	7	6
0416-0053-NHC	Chinese	Male	50	(40,50]	No	NA	NA	Sedentary job	Some but less than 1 hour	None	1 hour but less than 3 hours	Some but less than 1 hour	Some but less than 1 hour	Fast	2	1	1	2	1	1	60	4	Never/hardly	80	130	NA	67.5	82	90	123	70	63	83	1.67	60.9	21.8366	1.06	3.27	4.94	1.35	5.6	72.3169	67.1714	75.3226	11245.3	11.2453	CatIII	4	3
0416-0054-NHC	Malay	Female	33	(30,40]	No	NA	NA	Sedentary job	None	None	3 hours or more	3 hours or more	None	Steady average pace	3	0	3	2	0	NA	NA	7	Never/hardly	67	127	NA	78.7	94	104	137	79	62	71	1.66	67.7	24.5682	1.4	2.48	4.42	1.18	5.2	72.6833	61.3594	80.1186	7634.5	7.6345	CatII	6	2
0416-0063-NHC	Chinese	Male	42	(40,50]	No	NA	NA	Active job	1 hour but less than 3 hours	None	3 hours or more	None	None	Fast	3	2	0	3	3	NA	NA	6	Never/hardly	120	150	139	79	93	93	133	97	68	62	1.81	89	27.1664	1.34	3.37	5.7	2.17	5.3	75.5739	75.766	78.9706	8066.75	8.06675	CatII	5	4
0416-0068-NHC	Chinese	Female	25	(20,30]	No	NA	NA	Active job	1 hour but less than 3 hours	None	3 hours or more	Some but less than 1 hour	None	Brisk pace	3	2	1	3	3	3	30	6	Often/always	69.4	129.4	NA	67	76	86	103	67	74	75	1.58	53	21.2306	1.91	2.64	4.89	0.75	4.5	66.993	59.5745	65.3784	15672	15.672	CatIII	5	4
0416-0085-NHC	Chinese	Male	56	(50,60]	No	NA	NA	Sedentary job	Some but less than 1 hour	None	None	None	None	Steady average pace	0	1	0	2	1	3	30	6	Often/always	89	136.6	NA	80	70	73	139	89	51	51	1.61	51.9	20.0224	1.73	4.23	6.33	0.82	5.2	61.4229	56.0556	65.5769	14548.3	14.5483	CatIII	4	3
0416-0086-NHC	Chinese	Female	52	(50,60]	No	NA	NA	Active job	None	Some but less than 1 hour	1 hour but less than 3 hours	1 hour but less than 3 hours	None	Fast	2	0	2	3	1	2	60	6	Often/always	73.2	132.6	NA	72.2	76	99	115	56	53	55	1.7	61.4	21.2457	1.22	3.3	4.95	0.95	5.3	58.957	54	64.5714	10328.5	10.3285	CatII	5	2
0416-0090-NHC	Chinese	Female	67	(60,70]	No	NA	NA	Not employed	Some but less than 1 hour	None	1 hour but less than 3 hours	None	None	Steady average pace	2	1	0	1	1	2	30	7	Never/hardly	63.48	92.58	NA	63.2	83	94	142	71	53	56	1.61	56.1	21.64	1.36	4.23	6.33	1.64	5.7	64.8911	58.2833	71.3	9420.6	9.4206	CatII	6	5
0515-0019-NHC	Chinese	Male	43	(40,50]	No	NA	NA	Sedentary job	3 hours or more	None	3 hours or more	Some but less than 1 hour	None	Brisk pace	3	3	1	2	3	3	45	6	Often/always	109.2	158.7	167.1	80.96	91	105	139	88	NA	102	1.66	80.4	29.1769	1.21	4.34	6.04	1.07	5.2	67.3396	62.6833	71.5806	14601.5	14.6015	CatIII	5	4
0515-0023-NHC	Chinese	Female	50	(40,50]	No	NA	NA	Sedentary job	3 hours or more	None	3 hours or more	1 hour but less than 3 hours	None	Steady average pace	3	3	2	2	3	1	60	7	Never/hardly	78.1	125.6	149.9	74.8	79	87	111	69	67	82	1.61	58.3	22.4914	2.02	3.53	5.83	0.62	5.2	70.8462	62.2353	73.72	10297.2	10.2972	CatII	6	5
0515-0045-NHC	Chinese	Female	56	(50,60]	No	NA	NA	Not employed	1 hour but less than 3 hours	None	1 hour but less than 3 hours	1 hour but less than 3 hours	None	Steady average pace	2	2	2	1	2	1	20	9	Often/always	48.2	87.8	81.4	63	75	86	116	72	71	69	1.56	57.4	23.5865	1.86	4.03	6.3	0.91	5.5	75.7857	70.2542	83.1842	9224.67	9.22467	CatII	6	3
0515-0054-NHC	Chinese	Female	46	(40,50]	No	NA	NA	Not employed	None	None	1 hour but less than 3 hours	3 hours or more	None	Steady average pace	2	0	3	1	0	NA	NA	6	Never/hardly	50.4	93.9	107.5	50.8	80	93	148	95	96	90	1.59	58.2	23.0212	1.45	3.12	5.13	1.23	4.6	83.4556	75.5532	93.44	6877.25	6.87725	CatII	5	4
0516-0002-NHC	Chinese	Male	63	(60,70]	No	NA	NA	Not employed	3 hours or more	None	None	None	None	Steady average pace	0	3	0	1	3	4	60	7	Often/always	90	136	NA	90.5	90	94	143	77	47	59	1.75	65.4	21.3551	2.22	4.21	6.94	1.13	5.5	57.6244	58	63.3864	9655.6	9.6556	CatII	6	5
0516-0008-NHC	Chinese	Male	58	(50,60]	No	NA	NA	Sedentary job	1 hour but less than 3 hours	1 hour but less than 3 hours	3 hours or more	3 hours or more	None	Fast	3	2	3	2	2	4	30	6	Often/always	92	124	NA	70	85	86	143	94	50	66	1.6	53.7	20.98	1.47	4.08	6.06	1.12	5.4	61.6835	51.6833	72.5152	14548.8	14.5488	CatIII	6	4
0516-0009-NHC	Chinese	Female	24	(20,30]	No	NA	NA	Sedentary job	3 hours or more	None	Some but less than 1 hour	None	None	Brisk pace	1	3	0	2	3	4	75	7	Often/always	60.8	122.3	NA	62.8	80	89	115	72	52	59	1.65	50.7	18.62	1.44	2.38	4.19	0.81	4.6	61.9326	52.3958	63.2745	12885.2	12.8852	CatIII	6	4
0516-0024-NHC	Indian	Male	55	(50,60]	No	NA	NA	Active job	1 hour but less than 3 hours	None	1 hour but less than 3 hours	None	None	Steady average pace	2	2	0	3	3	3	30	7	Often/always	92	120	141	67	93	103	131	78	83	77	1.76	74.8	24.1477	0.9	0.6	4.5	5	5.7	82.7037	71.8636	96.383	8089.5	8.0895	CatII	5	4
0516-0032-NHC	Chinese	Male	21	(20,30]	No	NA	NA	Sedentary job	3 hours or more	None	3 hours or more	None	None	Steady average pace	3	3	0	2	3	6	90	7	Often/always	103	162	NA	89	76	93	117	75	50	49	1.71	64.7	22.1265	1.59	2.57	4.53	0.82	5	62.023	51.7083	66	13437	13.437	CatIII	5	4
0516-0040-NHC	Chinese	Female	60	(50,60]	No	NA	NA	Active job	None	None	3 hours or more	3 hours or more	1 hour but less than 3 hours	Brisk pace	3	0	3	3	1	2	30	7	Never/hardly	116.6	129	NA	86.1	89	109	145	89	55	59	1.56	73.1	30.0378	1.45	3.76	5.78	1.26	5.8	70.5227	56.5667	76.1935	14964	14.964	CatIII	4	3
0516-0041-NHC	Chinese	Male	55	(50,60]	No	NA	NA	Sedentary job	1 hour but less than 3 hours	None	1 hour but less than 3 hours	None	None	Brisk pace	2	2	0	2	2	1	20	6	Often/always	117	105	NA	57.6	90	95	142	88	76	74	1.76	68.8	22.2107	1.09	3.88	5.99	2.25	5.8	81.0337	75.1026	88.1228	5131.2	5.1312	CatI	6	5
0516-0042-NHC	Chinese	Female	21	(20,30]	No	NA	NA	Sedentary job	None	None	1 hour but less than 3 hours	Some but less than 1 hour	None	Steady average pace	2	0	1	2	0	NA	NA	8	Never/hardly	62.2	98	NA	61.2	71	82	114	75	75	81	1.54	45	18.9745	1.44	2.31	4.32	1.25	5.3	78.1027	68.6667	86.5556	13583.2	13.5832	CatIII	5	5
0516-0044-NHC	Chinese	Female	55	(50,60]	No	NA	NA	Not employed	Some but less than 1 hour	1 hour but less than 3 hours	3 hours or more	Some but less than 1 hour	None	Brisk pace	3	1	1	1	1	4	60	6	Often/always	48	84	NA	59.7	75	90	109	81	52	63	1.55	48.3	20.1041	1.7	3.37	5.55	1.05	5.8	60.4013	51.375	64.9143	10026.5	10.0265	CatII	5	4
0516-0059-NHC	Chinese	Male	67	(60,70]	No	NA	NA	Active job	3 hours or more	None	3 hours or more	None	None	Steady average pace	3	3	0	3	3	4	120	6	Often/always	95	133	NA	79	90	93	125	76	53	78	1.71	70.8	24.2126	1.64	3.83	6.11	1.41	5.2	65.4794	58.5833	67.9796	8150.4	8.1504	CatII	7	5
0516-0061-NHC	Chinese	Female	48	(40,50]	No	NA	NA	Not employed	None	None	3 hours or more	3 hours or more	None	Steady average pace	3	0	3	1	0	NA	NA	5	Never/hardly	72.65	115.3	NA	65.4	68	88	113	75	60	61	1.68	53.6	18.99	1.25	2.96	4.77	1.24	5.4	57.688	52.3636	67.0909	8964.25	8.96425	CatII	5	4
0516-0063-NHC	Chinese	Female	60	(50,60]	No	NA	NA	Sedentary job	1 hour but less than 3 hours	None	1 hour but less than 3 hours	1 hour but less than 3 hours	Some but less than 1 hour	Brisk pace	2	2	2	2	2	5	60	7	Often/always	61.1	83.57	NA	55.78	78	81	112	66	65	78	1.52	42.4	18.3518	2.28	3.86	6.46	0.7	4.7	66.1053	59.2143	70.7188	11313.5	11.3135	CatIII	6	6
0516-0073-NHC	Chinese	Female	67	(60,70]	No	NA	NA	Active job	None	None	None	Some but less than 1 hour	None	Steady average pace	0	0	1	3	1	NA	NA	8	Never/hardly	79.2	105	NA	53.7	94	110	156	78	81	79	1.52	71.1	30.77	1.71	4.04	6.5	1.65	4.6	79.5385	75.5517	80.0526	17819.5	17.8195	CatIV	5	4
0516-0076-NHC	Other	Female	52	(50,60]	No	NA	NA	Not employed	None	None	3 hours or more	1 hour but less than 3 hours	None	Steady average pace	3	0	2	1	0	1	60	8	Never/hardly	62.8	89.7	NA	62.6	76	80	132	81	55	75	1.59	53	20.96	1.76	3.13	5.22	0.73	5.4	66.8143	60.1944	71.5455	12360.7	12.3607	CatIII	4	3
0516-0077-NHC	Chinese	Male	56	(50,60]	No	NA	NA	Active job	None	None	3 hours or more	Some but less than 1 hour	None	Steady average pace	3	0	1	3	1	NA	NA	8	Never/hardly	95.9	135	NA	81.9	88	93	139	70	77	78	1.74	69.7	23.02	1.38	2.79	4.46	0.64	5.2	66.5802	59.7222	70.925	8161.33	8.16133	CatII	4	3
0516-0088-NHC	Chinese	Female	26	(20,30]	No	NA	NA	Sedentary job	None	None	3 hours or more	None	None	Steady average pace	3	0	0	2	0	2	30	7	Often/always	42	113	129	66	75	91	119	69	65	68	1.55	63	26.2227	1.21	4.35	6	0.97	4.7	72.2551	64.1579	73.125	13581.3	13.5813	CatIII	6	3
0516-0090-NHC	Chinese	Male	22	(20,30]	Yes	1	8	Not employed	None	None	Some but less than 1 hour	None	None	Brisk pace	1	0	0	1	0	NA	NA	7	Never/hardly	59	112	NA	61	70	87	109	80	52	73	1.66	58.9	21.3747	1.25	2.19	3.86	0.93	5	66.2376	77.88	66.25	14850.5	14.8505	CatIII	3	2
0615-0003-NHC	Chinese	Male	43	(40,50]	Yes	1	25	Active job	None	None	None	3 hours or more	None	Brisk pace	0	0	3	3	1	1	60	6	Never/hardly	91.7	110.7	123.1	60.27	91	97	134	86	68	99	1.7	66.7	23.0796	0.85	NA	6.92	5	4.7	79.1238	67.4583	88.4667	6456.75	6.45675	CatI	5	4
0615-0004-NHC	Chinese	Female	39	(30,40]	Yes	0.5	16	Active job	None	None	1 hour but less than 3 hours	3 hours or more	None	Steady average pace	2	0	3	3	1	NA	NA	6	Never/hardly	78.5	123.2	109.4	64.14	85	94	135	69	54	67	1.54	53.4	22.5164	1.3	1.36	3.05	0.85	5.2	65.1304	52.3571	77.0161	7002.2	7.0022	CatII	6	5
0615-0011-NHC	Chinese	Female	50	(40,50]	No	NA	NA	Sedentary job	Some but less than 1 hour	None	1 hour but less than 3 hours	3 hours or more	None	Brisk pace	2	1	3	2	1	4	90	7	Often/always	50.4	86.3	77.8	55.93	71	91	136	88	73	89	1.55	51.7	21.5193	1.56	2.11	4.06	0.85	5.2	70.7609	62.6875	74.119	14892.5	14.8925	CatIII	5	4
0615-0015-NHC	Chinese	Male	42	(40,50]	No	NA	NA	Highly active job	1 hour but less than 3 hours	None	3 hours or more	None	1 hour but less than 3 hours	Brisk pace	3	2	0	4	3	2	30	7	Often/always	89.8	116.2	116.3	70.72	80	91	144	79	NA	67	1.61	62.3	24.0346	1.02	3.89	5.35	0.98	4.7	63.454	52.75	78.0714	11395.2	11.3952	CatIII	6	5
0615-0016-NHC	Chinese	Female	42	(40,50]	No	NA	NA	Sedentary job	Some but less than 1 hour	None	3 hours or more	3 hours or more	None	Steady average pace	3	1	3	2	1	1	30	7	Never/hardly	70.6	109.7	134.7	68	80	89	123	82	53	76	1.67	58.8	21.0836	1.56	3.12	4.98	0.66	5.2	72.5924	62.9167	73.6458	5574.25	5.57425	CatI	5	4
0615-0018-NHC	Chinese	Female	42	(40,50]	No	NA	NA	Sedentary job	Some but less than 1 hour	None	Some but less than 1 hour	Some but less than 1 hour	None	Steady average pace	1	1	1	2	1	1	30	5	Often/always	65	105.2	123.6	65	72	95	122	75	82	NA	1.66	55.5	20.1408	1.56	1.73	3.71	0.92	4.9	65.5393	58.1389	70.0526	13938.3	13.9383	CatIII	4	3
0615-0038-NHC	Chinese	Male	40	(30,40]	No	NA	NA	Sedentary job	Some but less than 1 hour	None	3 hours or more	3 hours or more	None	Steady average pace	3	1	3	2	1	1	15	5	Never/hardly	133.1	155	155.9	95.19	100	109	150	100	60	71	1.77	92.8	29.6211	1.12	2.44	4.53	2.13	5.6	67.8821	58.0278	70.2121	9057.33	9.05733	CatII	4	3
0615-0047-NHC	Chinese	Male	53	(50,60]	Yes	1	30	Sedentary job	Some but less than 1 hour	None	3 hours or more	None	None	Slow	3	1	0	2	1	2	15	8	Never/hardly	101.7	127	122	70.85	93	102	138	94	65	74	1.62	68.9	26.2536	1.38	4.01	6.14	1.66	5.6	70.3844	60.7167	80.3571	12261.8	12.2618	CatIII	6	5
0615-0048-NHC	Chinese	Male	67	(60,70]	No	NA	NA	Not employed	None	None	3 hours or more	3 hours or more	None	Steady average pace	3	0	3	1	0	NA	NA	6	Often/always	108	103.1	96.2	70.4	103	119	149	97	74	84	1.7	87.3	30.2076	1.13	3.24	4.99	1.37	6.4	76.2494	72.75	79.1765	5852.4	5.8524	CatI	6	5
0616-0007-NHC	Chinese	Female	51	(50,60]	No	NA	NA	Active job	None	None	3 hours or more	None	None	Steady average pace	3	0	0	3	1	2	20	6	Often/always	73	98	NA	61	85	93	157	91	62	63	1.58	64.9	26	1.56	2.55	4.46	0.77	5.8	72.9577	69.25	71.1034	10253.3	10.2533	CatII	4	3
0616-0013-NHC	Chinese	Female	35	(30,40]	No	NA	NA	Active job	None	None	Some but less than 1 hour	1 hour but less than 3 hours	None	Brisk pace	1	0	2	3	1	NA	NA	8	Never/hardly	77.8	100.7	99.4	51.39	65	89	129	63	72	86	1.56	48.2	19.81	1.69	4.2	6.17	0.62	5	77.94	69.7708	83.4167	5192.75	5.19275	CatI	6	4
0616-0028-NHC	Chinese	Male	39	(30,40]	No	NA	NA	Sedentary job	None	None	3 hours or more	None	None	Steady average pace	3	0	0	2	0	NA	NA	6	Never/hardly	94	142	NA	70.9	96	102	117	NA	72	97	1.81	83.4	25.4571	1.14	3.1	5.59	2.97	6.2	73.6854	60.9429	90.381	7237.67	7.23767	CatII	4	3
0616-0036-NHC	Chinese	Female	62	(60,70]	No	NA	NA	Not employed	1 hour but less than 3 hours	Some but less than 1 hour	3 hours or more	3 hours or more	Some but less than 1 hour	Brisk pace	3	2	3	1	2	1	60	6	Often/always	NA	94	NA	59	75	78	108	57	61	59	1.53	48.9	20.89	1.56	2.64	4.54	0.76	5.2	68.3112	56.9667	73.6735	6868.8	6.8688	CatII	5	5
0715-0011-NHC	Chinese	Female	47	(40,50]	No	NA	NA	Active job	1 hour but less than 3 hours	None	3 hours or more	3 hours or more	1 hour but less than 3 hours	Steady average pace	3	2	3	3	3	2	60	7	Often/always	47	89	105	70	74	92	116	68	71	74	1.5	50.4	22.4	1.09	4.23	5.61	0.64	4.5	65.0336	55.9861	71.8696	12208.4	12.2084	CatIII	6	5
0715-0013-NHC	Chinese	Female	61	(60,70]	No	NA	NA	Sedentary job	Some but less than 1 hour	No input	No input	No input	No input	Brisk pace	NA	1	NA	2	1	NA	NA	6	Never/hardly	52.7	73.9	78.5	50.1	72	82	116	79	81	81	1.6	50	19.5312	1.49	4.13	6.23	1.35	5.8	75.2583	67.9167	80.6364	8511	8.511	CatII	6	3
0715-0026-NHC	Chinese	Male	57	(50,60]	No	NA	NA	Sedentary job	3 hours or more	Some but less than 1 hour	1 hour but less than 3 hours	None	None	Slow	2	3	0	2	3	3	70	8	Often/always	96.1	162	163.5	90.91	89	92	135	77	58	66	1.67	62.4	22.3744	1.33	3.24	4.99	0.92	5.1	58.1317	52.5167	62.4138	8660.25	8.66025	CatII	5	4
0715-0029-NHC	Chinese	Female	48	(40,50]	No	NA	NA	Sedentary job	1 hour but less than 3 hours	None	1 hour but less than 3 hours	Some but less than 1 hour	None	Slow	2	2	1	2	2	1	120	7	Often/always	70	136	143.9	76.85	77	95	105	65	65	84	1.58	60	24.0346	1.57	2.84	5	1.29	5.4	64.9725	50.3714	72.1154	11732	11.732	CatIII	4	2
0715-0033-NHC	Chinese	Female	53	(50,60]	No	NA	NA	Sedentary job	None	None	1 hour but less than 3 hours	3 hours or more	Some but less than 1 hour	Fast	2	0	3	2	0	NA	NA	5	Never/hardly	66.2	110.3	103.3	NA	80	100	115	72	63	66	1.62	56.8	21.643	1.94	4.87	7.31	1.11	5	68.8143	61	72.6316	10459	10.459	CatIII	3	2
0715-0035-NHC	Chinese	Female	27	(20,30]	No	NA	NA	Sedentary job	Some but less than 1 hour	Some but less than 1 hour	Some but less than 1 hour	None	None	Brisk pace	1	1	0	2	1	2	45	8	Often/always	58.5	84.8	105.4	56	81	99	139	72	69	62	1.58	59.7	23.9144	1.43	3.08	4.95	0.96	5	72.4347	62.4583	75.6296	9382.5	9.3825	CatII	6	4
0715-0036-NHC	Chinese	Female	49	(40,50]	No	NA	NA	Sedentary job	None	None	3 hours or more	3 hours or more	None	Brisk pace	3	0	3	2	0	1	45	8	Often/always	98.5	132.6	121.5	87.17	80	91	114	58	62	75	1.67	63.3	22.6971	1.66	2.63	4.8	1.13	5.5	67.9915	63.3	75.8462	13038.3	13.0383	CatIII	5	3
0715-0054-NHC	Chinese	Female	54	(50,60]	No	NA	NA	Sedentary job	1 hour but less than 3 hours	None	1 hour but less than 3 hours	1 hour but less than 3 hours	1 hour but less than 3 hours	Brisk pace	2	2	2	2	2	2	30	7	Often/always	75.4	110.5	115.7	71	75	92	113	87	70	86	1.6	55	21.4844	1.78	3.15	5.62	1.52	4.9	71.0664	64.25	77.8108	11773.7	11.7737	CatIII	5	3
0715-0055-NHC	Chinese	Male	60	(50,60]	No	NA	NA	Not employed	Some but less than 1 hour	Some but less than 1 hour	Some but less than 1 hour	1 hour but less than 3 hours	Some but less than 1 hour	Steady average pace	1	1	2	1	1	3	15	6	Often/always	72.6	107.6	116.9	64.55	85	92	133	83	62	79	1.68	59	20.9042	1.52	4.62	6.84	1.55	5.2	69.144	59.875	76.7586	8203.25	8.20325	CatII	4	4
0715-0059-NHC	Chinese	Female	61	(60,70]	No	NA	NA	Active job	None	3 hours or more	3 hours or more	3 hours or more	1 hour but less than 3 hours	Steady average pace	3	0	3	3	1	7	45	7	Often/always	NA	78.9	81.8	NA	83	94	150	91	59	77	1.57	57.1	23.1652	1.46	4.51	6.46	1.07	5.9	60.2135	49.2712	70.1351	6424.5	6.4245	CatI	6	4
0715-0063-NHC	Chinese	Female	65	(60,70]	No	NA	NA	Active job	None	None	3 hours or more	1 hour but less than 3 hours	Some but less than 1 hour	Fast	3	0	2	3	1	7	15	10	Often/always	47	99	101	NA	89	95	160	84	62	70	1.68	66.9	23.7	1.36	2.93	4.91	1.36	5.9	68.6151	63.2647	74.9459	11740	11.74	CatIII	4	3
0715-0070-NHC	Chinese	Female	47	(40,50]	No	NA	NA	Sedentary job	None	1 hour but less than 3 hours	1 hour but less than 3 hours	1 hour but less than 3 hours	1 hour but less than 3 hours	Brisk pace	2	0	2	2	0	3	30	5	Often/always	66.9	118.9	106.1	70.89	90	103	137	82	61	NA	1.67	77.5	27.7887	0.97	2.35	3.78	1.01	5.3	74.904	61.8261	81.4521	6710.8	6.7108	CatII	6	5
0715-0074-NHC	Chinese	Male	47	(40,50]	No	NA	NA	Sedentary job	None	3 hours or more	Some but less than 1 hour	1 hour but less than 3 hours	None	Brisk pace	1	0	2	2	0	1	15	7	Never/hardly	91	135.2	139.7	81.27	95	103	134	85	72	81	1.72	78.7	26.6022	1.41	2.35	4.41	1.43	5	70.741	64.4062	74.4375	13280.5	13.2805	CatIII	3	2
0715-0077-NHC	Chinese	Male	54	(50,60]	No	NA	NA	Sedentary job	1 hour but less than 3 hours	None	None	None	None	Steady average pace	0	2	0	2	2	2	60	7	Often/always	100.9	154.9	149.5	91.52	86	100	134	86	61	69	1.73	73.2	24.4579	1.36	4.35	6.22	1.12	5.4	63.6264	58.5556	64.6667	18789.7	18.7897	CatIV	3	3
0715-0080-NHC	Chinese	Female	50	(40,50]	No	NA	NA	Sedentary job	Some but less than 1 hour	Some but less than 1 hour	Some but less than 1 hour	Some but less than 1 hour	None	Slow	1	1	1	2	1	5	20	7	Never/hardly	57.2	112.7	92	59.57	99	107	115	69	57	79	1.65	76.1	27.9522	1.12	3.34	5.41	2.09	5.5	65.672	55.1562	76.8571	7806	7.806	CatII	3	3
0716-0002-NHC	Chinese	Female	56	(50,60]	No	NA	NA	Sedentary job	None	None	1 hour but less than 3 hours	Some but less than 1 hour	None	Brisk pace	2	0	1	2	0	0	0	5	Never/hardly	120.7	164.2	NA	87	104	117	146	99	58	66	1.51	83.4	36.58	1.3	3.73	5.51	1.05	5.7	68.6231	59.5417	87.75	22814.3	22.8143	CatIV	5	3
0716-0004-NHC	Chinese	Male	42	(40,50]	No	NA	NA	Sedentary job	1 hour but less than 3 hours	None	1 hour but less than 3 hours	1 hour but less than 3 hours	None	Brisk pace	2	2	2	2	2	2	90	5	Often/always	143	192	NA	89	87	94	129	85	67	83	1.83	77.5	23.14	1.54	1.67	3.63	0.92	5.5	76.2476	64.5319	80.3333	17891	17.891	CatIV	4	4
0716-0012-NHC	Other	Male	25	(20,30]	No	NA	NA	Not employed	1 hour but less than 3 hours	None	1 hour but less than 3 hours	Some but less than 1 hour	Some but less than 1 hour	Brisk pace	2	2	1	1	2	5	30	9	Often/always	133	171	NA	90	108	128	141	92	57	67	1.68	85.3	30.2225	1.04	2.8	4.2	0.8	4.9	60.1367	54.0154	65.0667	10830.5	10.8305	CatIII	6	6
0716-0014-NHC	Chinese	Male	52	(50,60]	No	NA	NA	Sedentary job	1 hour but less than 3 hours	None	None	None	None	Brisk pace	0	2	0	2	2	2	25	6	Often/always	89.9	132.1	NA	74.65	81	97	125	84	60	62	1.76	63.5	20.5	1.23	2.74	4.27	0.66	5.3	62.2966	56.3542	67.3913	9518.25	9.51825	CatII	4	4
0716-0016-NHC	Chinese	Female	35	(30,40]	No	NA	NA	Sedentary job	1 hour but less than 3 hours	Some but less than 1 hour	3 hours or more	1 hour but less than 3 hours	None	Brisk pace	3	2	2	2	2	1	60	6	Often/always	67	103	NA	56.68	72	88	109	62	70	84	1.58	51.7	20.71	1.8	3.86	5.95	0.65	4.9	68.7109	59.3333	75.5128	6074.75	6.07475	CatI	4	4
0716-0024-NHC	Chinese	Female	51	(50,60]	No	NA	NA	Sedentary job	1 hour but less than 3 hours	None	3 hours or more	Some but less than 1 hour	None	Brisk pace	3	2	1	2	2	1	30	7	Often/always	81.2	127	140.5	74	81	90	119	69	65	78	1.64	56.5	21.01	2.09	3.25	5.71	0.82	5.1	64.4823	52.5667	70.6471	16920.4	16.9204	CatIV	6	5
0716-0028-NHC	Chinese	Female	37	(30,40]	No	NA	NA	Active job	None	None	Some but less than 1 hour	None	None	Slow	1	0	0	3	1	NA	NA	7	Never/hardly	70	106	NA	66	90	102	106	60	56	72	1.57	61.3	24.8692	1.42	3	4.86	0.96	5.2	69.2968	61.8958	76.0476	10978.7	10.9787	CatIII	5	3
0716-0043-NHC	Chinese	Male	59	(50,60]	Yes	1	20	Active job	None	None	3 hours or more	Some but less than 1 hour	None	Brisk pace	3	0	1	3	1	4	60	NA	Often/always	77	125	136.5	75	102	106	134	70	66	70	1.68	78.7	27.8841	1.47	3.93	5.95	1.22	5.9	68.2521	66.5161	69.9231	7705	7.705	CatII	4	3
0716-0047-NHC	Chinese	Female	47	(40,50]	No	NA	NA	Not employed	1 hour but less than 3 hours	Some but less than 1 hour	1 hour but less than 3 hours	1 hour but less than 3 hours	Some but less than 1 hour	Steady average pace	2	2	2	1	2	5	50	6	Often/always	48.32	122.4	NA	78.1	80	88	117	61	48	NA	1.56	53.3	21.9017	1.42	2	3.78	0.79	4.8	55.6667	52.6111	56.9355	14405.3	14.4053	CatIII	4	3
0716-0048-NHC	Chinese	Male	48	(40,50]	No	NA	NA	Active job	3 hours or more	None	3 hours or more	None	None	Steady average pace	3	3	0	3	3	5	30	7	Often/always	116	172.5	NA	97.2	91	100	150	87	50	59	1.65	77.2	28.3563	1.13	2.67	4.26	1.01	4.8	55.8516	48.6	57.2432	10887.3	10.8873	CatIII	4	3
0815-0011-NHC	Chinese	Female	54	(50,60]	No	NA	NA	Not employed	Some but less than 1 hour	None	3 hours or more	3 hours or more	Some but less than 1 hour	Slow	3	1	3	1	1	NA	NA	7	Never/hardly	46	107.4	97	61.47	65	89	120	75	64	64	1.56	45.8	18.8199	1.83	2.93	4.99	0.51	5.3	65.9247	59.2917	72.28	8150	8.15	CatII	4	2
0815-0017-NHC	Chinese	Male	54	(50,60]	No	NA	NA	Highly active job	1 hour but less than 3 hours	None	3 hours or more	3 hours or more	None	Brisk pace	3	2	3	4	3	1	40	7	Often/always	72	158	148	79	94	99	128	85	54	62	1.75	80.7	26.351	0.97	3.49	5.21	1.65	5	67.4167	58.1111	81	14411	14.411	CatIII	4	3
0815-0018-NHC	Chinese	Female	23	(20,30]	No	NA	NA	Active job	1 hour but less than 3 hours	1 hour but less than 3 hours	Some but less than 1 hour	Some but less than 1 hour	None	Slow	1	2	1	3	3	2	120	6	Often/always	66.1	120.1	121.7	74	85	98	118	70	71	81	1.59	71.7	28.3612	1.26	2.49	3.99	0.54	5.4	68.4818	65.9556	73.4828	6583	6.583	CatI	4	4
0815-0024-NHC	Chinese	Female	50	(40,50]	No	NA	NA	Not employed	Some but less than 1 hour	None	Some but less than 1 hour	Some but less than 1 hour	None	Slow	1	1	1	1	1	NA	NA	6	Never/hardly	31.8	68.4	61.3	44.8	62	73	102	68	61	84	1.42	38.6	19.143	1.86	4.99	7.34	1.07	5.3	64.9627	56.0169	74.4048	12929.2	12.9292	CatIII	6	5
0815-0037-NHC	Chinese	Female	62	(60,70]	No	NA	NA	Active job	None	None	3 hours or more	3 hours or more	1 hour but less than 3 hours	Fast	3	0	3	3	1	NA	NA	6	Never/hardly	62.3	92	86.6	62.76	69	92	130	74	60	64	1.61	48.3	18.6335	1.91	3.71	5.84	0.48	5.7	69.4719	60.8511	74.1915	8578.25	8.57825	CatII	5	4
0815-0039-NHC	Chinese	Male	46	(40,50]	No	NA	NA	Sedentary job	1 hour but less than 3 hours	None	3 hours or more	1 hour but less than 3 hours	None	Steady average pace	3	2	2	2	2	3	75	7	Often/always	91.8	123.7	132.2	79.29	80	95	147	97	62	73	1.72	71.2	24.0671	1.05	2.7	4.15	0.89	4.9	67.5649	53.2667	71.3333	9573.8	9.5738	CatII	5	5
0815-0041-NHC	Chinese	Female	46	(40,50]	No	NA	NA	Not employed	None	None	Some but less than 1 hour	Some but less than 1 hour	None	Steady average pace	1	0	1	1	0	1	20	7	Often/always	69.7	93.3	120.5	61.28	66	87	138	87	67	69	1.5	44	19.5556	1.65	2.88	4.92	0.85	5.1	65.0979	54.0208	72.5312	13443.2	13.4433	CatIII	5	4
0815-0054-NHC	Chinese	Female	45	(40,50]	No	NA	NA	Not employed	None	None	3 hours or more	3 hours or more	None	Brisk pace	3	0	3	1	0	NA	NA	6	Never/hardly	58	130	103	69	82	98	111	80	NA	70	1.68	52	18.424	1.37	3.33	5.31	1.34	5.5	72.4386	65.5362	77.5283	9091.6	9.0916	CatII	6	5
0815-0059-NHC	Chinese	Female	62	(60,70]	No	NA	NA	Sedentary job	None	None	Some but less than 1 hour	Some but less than 1 hour	None	Brisk pace	1	0	1	2	0	1	30	6	Often/always	77.9	108	134.1	72.9	92	102	129	67	66	67	1.65	66.6	24.46	1.47	3.3	6.31	3.38	5.5	71.486	60.3939	77.0667	12193	12.193	CatIII	4	2
0815-0062-NHC	Chinese	Male	49	(40,50]	No	NA	NA	Sedentary job	1 hour but less than 3 hours	None	None	None	None	Brisk pace	0	2	0	2	2	2	30	7	Often/always	99	159.6	159.4	84.21	92	87	135	73	66	57	1.76	72.1	23.2761	1.13	3.37	5.22	1.58	5.4	65.2279	58.7833	70.6098	6679.8	6.6798	CatII	6	5
0815-0069-NHC	Chinese	Female	44	(40,50]	No	NA	NA	Sedentary job	1 hour but less than 3 hours	None	3 hours or more	3 hours or more	1 hour but less than 3 hours	Steady average pace	3	2	3	2	2	1	60	7	Often/always	62.8	121.9	119	75.62	72	90	120	78	61	68	1.55	54.7	22.768	1.5	3.42	5.43	1.12	5.2	63.3059	50.8475	74.1538	7560.8	7.5608	CatII	5	5
0815-0070-NHC	Chinese	Male	25	(20,30]	No	NA	NA	Sedentary job	None	None	1 hour but less than 3 hours	None	None	Steady average pace	2	0	0	2	0	NA	NA	5	Never/hardly	74.6	129	119	74.5	82	95	135	95	81	80	1.64	62.4	23.2005	1.22	3.62	5.23	0.86	4.9	79.4216	69.6173	81.7273	9831	9.831	CatII	6	5
0816-0010-NHC	Chinese	Female	35	(30,40]	No	NA	NA	Sedentary job	3 hours or more	None	3 hours or more	1 hour but less than 3 hours	1 hour but less than 3 hours	Brisk pace	3	3	2	2	3	3	60	6	Often/always	52	122	NA	71	69	96	121	72	60	60	1.64	56.5	21.01	1.76	7	9.15	0.86	5	65.9023	57.4894	70.3684	9805	9.805	CatII	5	3
0816-0014-NHC	Chinese	Female	39	(30,40]	No	NA	NA	Active job	None	None	Some but less than 1 hour	Some but less than 1 hour	None	Brisk pace	1	0	1	3	1	1	60	8	Never/hardly	84	127.5	NA	65	82	98	105	74	66	73	1.57	61.2	24.8286	1.52	2.31	4.14	0.69	4.9	62.9847	55.1324	73.3077	8127.8	8.1278	CatII	6	5
0816-0019-NHC	Chinese	Female	45	(40,50]	No	NA	NA	Active job	None	None	3 hours or more	3 hours or more	None	Steady average pace	3	0	3	3	1	5	40	6	Often/always	69.1	98.1	NA	63.94	84	98	111	62	68	69	1.58	52.4	20.9902	1.4	2.9	4.62	0.7	4.7	69.848	66.1389	73.8462	18046.5	18.0465	CatIV	5	2
0816-0039-NHC	Chinese	Male	30	(20,30]	No	NA	NA	Sedentary job	3 hours or more	None	1 hour but less than 3 hours	None	None	Steady average pace	2	3	0	2	3	4	60	7	Often/always	103	150.7	NA	76.8	94	102	125	84	80	77	1.66	79.6	28.89	1.54	3.8	5.62	0.61	5.4	78.526	69.875	79.1471	17058.5	17.0585	CatIV	4	2
0816-0046-NHC	Chinese	Female	32	(30,40]	No	NA	NA	Sedentary job	None	None	1 hour but less than 3 hours	None	None	Steady average pace	2	0	0	2	0	NA	NA	6	Never/hardly	51.4	134.7	NA	75.2	67	78	86	44	68	68	1.63	49	18.44	1.37	2.59	4.17	0.47	4.8	74.0683	63.0847	83.9375	9050	9.05	CatII	5	4
0816-0051-NHC	Chinese	Male	43	(40,50]	No	NA	NA	Sedentary job	3 hours or more	None	1 hour but less than 3 hours	1 hour but less than 3 hours	None	Steady average pace	2	3	2	2	3	5	60	4	Often/always	74.6	195	NA	97	83	92	129	86	55	61	1.72	83.4	28.19	1.7	2.83	5	1.03	5.6	59.765	49.0833	63.1333	10251	10.251	CatII	4	3
0816-0063-NHC	Chinese	Female	56	(50,60]	No	NA	NA	Sedentary job	None	None	Some but less than 1 hour	Some but less than 1 hour	None	Slow	1	0	1	2	0	1	20	8	Never/hardly	66	102.7	NA	70.56	79	91	122	52	NA	78	1.64	59.4	22.09	1.26	3.05	5.54	2.7	5.8	71.9653	61.8333	81.4333	6833	6.833	CatII	3	2
0816-0066-NHC	Chinese	Female	35	(30,40]	No	NA	NA	Sedentary job	1 hour but less than 3 hours	None	1 hour but less than 3 hours	None	None	Steady average pace	2	2	0	2	2	3	20	6	Often/always	37	109	NA	64	74	86	104	74	70	68	1.68	48.3	17.1131	1.52	2.66	4.55	0.82	5	75.3489	62.4937	81.4051	5660	5.66	CatI	7	4
0816-0072-NHC	Malay	Male	27	(20,30]	No	NA	NA	Sedentary job	1 hour but less than 3 hours	None	3 hours or more	Some but less than 1 hour	None	Fast	3	2	1	2	2	2	75	7	Often/always	101	130.1	NA	80.39	80	93	128	77	74	86	1.68	64.8	22.9592	1.4	3.16	4.81	0.56	5.1	72.4879	63.3559	74.9667	12606	12.606	CatIII	5	5
0816-0079-NHC	Chinese	Male	41	(40,50]	No	NA	NA	Sedentary job	None	None	Some but less than 1 hour	Some but less than 1 hour	None	Steady average pace	1	0	1	2	0	2	20	7	Never/hardly	80	103	NA	68	82	85	146	87	69	86	1.79	66.3	20.6922	0.95	3.24	5.01	1.81	4.8	75.0778	67.5	79.3889	12903	12.903	CatIII	4	2
0915-0038-NHC	Chinese	Male	49	(40,50]	No	NA	NA	Sedentary job	1 hour but less than 3 hours	None	3 hours or more	3 hours or more	Some but less than 1 hour	Brisk pace	3	2	3	2	2	5	30	7	Often/always	107.6	126.6	140.6	78.67	90	98	160	104	55	76	1.77	77	24.5779	1.27	2.99	4.6	0.75	5.2	65.7149	56.5833	67.2424	16218	16.218	CatIV	4	3
0915-0042-NHC	Chinese	Female	50	(40,50]	No	NA	NA	Not employed	None	None	1 hour but less than 3 hours	3 hours or more	3 hours or more	Fast	2	0	3	1	0	3	45	5	Often/always	52.2	85.8	91.4	55.87	72	93	123	70	65	79	1.55	51.7	21.52	1.88	3.17	5.3	0.55	5.4	70.3085	66.9583	78.8889	16418	16.418	CatIV	5	3
0915-0057-NHC	Chinese	Male	23	(20,30]	No	NA	NA	Not employed	None	None	1 hour but less than 3 hours	None	None	Fast	2	0	0	1	0	3	60	7	Never/hardly	91.8	155.9	164.2	84.92	84	95	129	67	71	79	1.74	69.1	22.82	1.75	3.02	5.05	0.61	5.3	72.4201	60.5833	80.3636	7829.75	7.82975	CatII	4	4
0915-0067-NHC	Chinese	Male	25	(20,30]	No	NA	NA	Highly active job	Some but less than 1 hour	3 hours or more	3 hours or more	1 hour but less than 3 hours	Some but less than 1 hour	Fast	3	1	2	4	3	NA	NA	5	Never/hardly	108	155	164.9	93.5	89	105	148	84	51	65	1.73	81.7	27.3	1.71	3.7	5.9	1.08	5.1	63.445	56.4681	70.7273	16312	16.312	CatIV	5	3
0915-0072-NHC	Indian	Female	43	(40,50]	No	NA	NA	Not employed	None	None	1 hour but less than 3 hours	1 hour but less than 3 hours	None	Slow	2	0	2	1	0	5	15	7	Often/always	49.3	90.5	89.9	47.13	96	106	118	60	73	89	1.63	65.3	24.58	1.17	2.72	4.47	1.28	5.8	78.4533	66.1739	82.9286	7924	7.924	CatII	5	3
0915-0082-NHC	Chinese	Female	56	(50,60]	No	NA	NA	Active job	None	None	3 hours or more	3 hours or more	None	Steady average pace	3	0	3	3	1	3	30	6	Often/always	97.3	123.4	115.8	66.8	92	112	155	94	88	77	1.52	70.4	30.47	1.47	2.82	5.18	1.96	5.3	82.7615	75.5517	87.6923	11568.2	11.5682	CatIII	6	5
0915-0084-NHC	Chinese	Male	61	(60,70]	No	NA	NA	Highly active job	3 hours or more	None	3 hours or more	1 hour but less than 3 hours	1 hour but less than 3 hours	Fast	3	3	2	4	3	5	120	7	Often/always	81.3	89.4	129.3	NA	82	93	111	76	60	87	1.68	62.9	22.29	1.6	3.3	5.22	0.71	6.6	76.0355	61.6786	83.6182	13651.4	13.6514	CatIII	7	5
0915-0086-NHC	Chinese	Female	43	(40,50]	No	NA	NA	Sedentary job	None	None	Some but less than 1 hour	3 hours or more	None	Slow	1	0	3	2	0	NA	NA	6	Never/hardly	73.5	126.3	121.3	73.65	86	104	142	100	83	75	1.57	70.3	28.5204	1.25	3.21	4.66	0.45	5.1	75.9889	65.814	81.3077	18228.3	18.2283	CatIV	4	3
0916-0004-NHC	Chinese	Female	49	(40,50]	No	NA	NA	Sedentary job	None	None	3 hours or more	3 hours or more	None	Steady average pace	3	0	3	2	0	7	15	8	Never/hardly	50	122	NA	73	90	100	107	57	68	72	1.54	64	26.986	1.45	2.8	4.39	0.31	5	71.3446	69.25	72.05	11714.7	11.7147	CatIII	3	3
0916-0008-NHC	Chinese	Female	51	(50,60]	No	NA	NA	Sedentary job	None	None	1 hour but less than 3 hours	Some but less than 1 hour	Some but less than 1 hour	Steady average pace	2	0	1	2	0	6	45	6	Often/always	90	147.4	NA	76.8	103	123	128	70	90	81	1.63	96.3	36.25	0.86	2.48	4.59	2.75	5.2	84.9143	79.8654	87.9783	13191.2	13.1913	CatIII	5	4
0916-0010-NHC	Chinese	Female	48	(40,50]	No	NA	NA	Active job	1 hour but less than 3 hours	None	1 hour but less than 3 hours	1 hour but less than 3 hours	Some but less than 1 hour	Fast	2	2	2	3	3	5	60	7	Often/always	55.6	108.9	NA	63.6	71	88	125	77	60	67	1.59	55.6	21.99	1.71	2.13	4.12	0.61	4.8	71.8679	60.3889	76.64	4473.5	4.4735	CatI	4	2
0916-0015-NHC	Chinese	Female	56	(50,60]	No	NA	NA	Sedentary job	1 hour but less than 3 hours	None	3 hours or more	Some but less than 1 hour	None	Steady average pace	3	2	1	2	2	2	60	5	Often/always	55	134	NA	NA	76	96	129	87	75	79	1.65	55.3	20.31	2.38	4.8	7.47	0.65	5.4	70.1698	57.2917	78	12461	12.461	CatIII	5	4
0916-0021-NHC	Malay	Male	25	(20,30]	Yes	0.5	2	Highly active job	None	None	3 hours or more	None	None	Brisk pace	3	0	0	4	2	NA	NA	6	Never/hardly	83.1	188.9	NA	91.4	84	99	108	49	67	52	1.73	75	25.0593	1.16	3.66	5.16	0.74	5	65.9384	52.9318	77.5172	11510.2	11.5102	CatIII	5	4
0916-0028-NHC	Chinese	Female	29	(20,30]	No	NA	NA	Sedentary job	Some but less than 1 hour	None	1 hour but less than 3 hours	None	None	Slow	2	1	0	2	1	3	30	5	Often/always	65.3	111.1	NA	67.7	65	84	92	45	70	71	1.64	54	20.08	1.71	3.02	4.92	0.43	5	70.9341	64.5	75.8667	7350	7.35	CatII	7	3
0916-0037-NHC	Chinese	Male	31	(30,40]	No	NA	NA	Highly active job	1 hour but less than 3 hours	3 hours or more	Some but less than 1 hour	Some but less than 1 hour	None	Steady average pace	1	2	1	4	3	4	30	6	Often/always	119	176	184	87	90	93	132	83	72	82	1.7	87	30.1	1.13	3.84	6.12	2.54	5.4	78.1457	74.8136	79.4082	10942.2	10.9422	CatIII	6	4
0916-0038-NHC	Chinese	Female	64	(60,70]	No	NA	NA	Not employed	1 hour but less than 3 hours	None	3 hours or more	3 hours or more	None	Steady average pace	3	2	3	1	2	3	30	6	Often/always	65	106	NA	62	88	110	140	68	59	86	1.67	67	24.0238	1.27	3.11	4.81	0.94	5.4	72.2751	64.1944	76.6923	3292	3.292	CatI	4	2
0916-0041-NHC	Chinese	Male	31	(30,40]	No	NA	NA	Sedentary job	None	None	3 hours or more	Some but less than 1 hour	3 hours or more	Slow	3	0	1	2	0	NA	NA	6	Never/hardly	51.3	112.9	NA	59.9	66	71	116	71	73	70	1.65	48.2	17.7	1.59	1.94	3.97	0.96	5.1	75.5175	65.1562	86.6111	5283.33	5.28333	CatI	4	3
0916-0048-NHC	Chinese	Male	51	(50,60]	No	NA	NA	Sedentary job	None	None	1 hour but less than 3 hours	1 hour but less than 3 hours	None	Steady average pace	2	0	2	2	0	NA	NA	6	Never/hardly	75	130.4	NA	67.1	86	93	161	104	90	78	1.71	75.2	25.72	0.94	8	5.48	4.85	8.1	82.3559	74.0208	89.3023	7419.25	7.41925	CatII	5	4
0916-0052-NHC	Chinese	Male	37	(30,40]	No	NA	NA	Active job	3 hours or more	None	3 hours or more	3 hours or more	None	Brisk pace	3	3	3	3	3	3	40	6	Often/always	96	160	NA	93	91	98	120	82	56	53	1.77	70	22.34	1.35	4.11	5.85	0.85	5.3	62.5099	55.2958	70.7551	8796.5	8.7965	CatII	7	4
0916-0059-NHC	Chinese	Male	46	(40,50]	No	NA	NA	Sedentary job	3 hours or more	None	None	None	None	Steady average pace	0	3	0	2	3	5	50	7	Often/always	95	141	159	78	83	98	110	73	70	54	1.67	70	25.0995	1.33	4.29	6.17	1.21	5.1	69.5292	66.5143	71.439	6924	6.924	CatII	4	3
0916-0073-NHC	Chinese	Female	41	(40,50]	No	NA	NA	Sedentary job	1 hour but less than 3 hours	None	1 hour but less than 3 hours	None	Some but less than 1 hour	Brisk pace	2	2	0	2	2	1	60	7	Often/always	73	130	NA	83	87	95	100	69	56	76	1.59	62.4	24.68	1.83	1.96	4.12	0.72	5.2	69.9053	61.0714	72.8116	13607.5	13.6075	CatIII	6	6
0916-0088-NHC	Chinese	Female	54	(50,60]	No	NA	NA	Not employed	3 hours or more	None	1 hour but less than 3 hours	None	None	Brisk pace	2	3	0	1	3	3	60	6	Often/always	60.6	107.6	NA	52.7	83	98	178	72	55	63	1.55	48.9	20.35	2.34	4.77	7.36	0.55	5.1	68.8522	58.8448	70.9333	6706.25	6.70625	CatII	6	4
1014-0052-NHC	Chinese	Male	44	(40,50]	No	NA	NA	Active job	Some but less than 1 hour	Some but less than 1 hour	Some but less than 1 hour	None	None	Brisk pace	1	1	0	3	2	3	30	7	Often/always	92.4	133	167	75	96	103	118	77	72	67	1.71	71.2	24.3494	1.27	3.15	5.04	0.72	5.5	69.5087	60.3889	83.5714	16595	16.595	CatIV	3	3
1015-0001-NHC	Chinese	Male	53	(50,60]	No	NA	NA	Sedentary job	1 hour but less than 3 hours	None	1 hour but less than 3 hours	Some but less than 1 hour	None	Brisk pace	2	2	1	2	2	2	45	7	Often/always	51	106	114	60	81	95	135	82	67	76	1.66	58.1	21.08	1.52	4.04	5.89	0.73	4.9	73.1451	61.8298	76.102	6642	6.642	CatI	4	2
1015-0027-NHC	Chinese	Male	59	(50,60]	No	NA	NA	Not employed	1 hour but less than 3 hours	None	3 hours or more	None	None	Steady average pace	3	2	0	1	2	5	120	6	Often/always	91.2	105.3	122.5	69.7	88	95	154	102	65	64	1.72	68.5	23.15	1.04	2.6	4.16	1.15	4.6	65.7807	56.2326	72.0588	14244.3	14.2443	CatIII	4	3
1015-0035-NHC	Chinese	Male	39	(30,40]	No	NA	NA	Sedentary job	None	None	Some but less than 1 hour	None	None	Steady average pace	1	0	0	2	0	5	30	6	Often/always	83	139	143	79	86	99	138	64	66	76	1.74	87.5	28.9	1.29	4.13	5.7	0.62	5.1	65.7708	62.9167	70	3383	3.383	CatI	4	3
1015-0036-NHC	Chinese	Female	39	(30,40]	No	NA	NA	Sedentary job	None	None	1 hour but less than 3 hours	1 hour but less than 3 hours	None	Steady average pace	2	0	2	2	0	NA	NA	6	Never/hardly	59	88	94	65	85	102	129	92	80	78	1.58	55.3	22.15	1.63	2.11	4.11	0.82	5	77.4403	70.2941	80.1429	4401	4.401	CatI	4	3
1015-0038-NHC	Malay	Male	27	(20,30]	Yes	1	7	Not employed	3 hours or more	None	3 hours or more	None	None	Brisk pace	3	3	0	1	3	2	60	8	Never/hardly	122	178	141	112	89	97	144	77	49	52	1.87	79	22.59	0.99	3.64	5.9	2.8	4.9	60.4708	51.0625	66.3061	10427.8	10.4277	CatIII	6	4
1015-0041-NHC	Chinese	Female	48	(40,50]	No	NA	NA	Sedentary job	3 hours or more	None	1 hour but less than 3 hours	Some but less than 1 hour	None	Steady average pace	2	3	1	2	3	4	20	7	Often/always	57.7	92.2	98.2	64.55	76	92	112	81	NA	58	1.6	50.1	19.57	1.47	2.7	4.41	0.53	4.9	64.0174	54.0833	65.4	13735.3	13.7353	CatIII	4	3
1015-0064-NHC	Malay	Female	23	(20,30]	No	NA	NA	Physical job	None	Some but less than 1 hour	3 hours or more	Some but less than 1 hour	None	Steady average pace	3	0	1	5	3	NA	NA	7	Never/hardly	95.2	134	142.2	67.9	128	138	170	104	77	103	1.65	119.2	43.78	1.21	2.21	3.98	1.23	6.2	90.6753	80.3571	100.086	9864.25	9.86425	CatII	5	4
1015-0066-NHC	Chinese	Male	28	(20,30]	No	NA	NA	Sedentary job	1 hour but less than 3 hours	None	Some but less than 1 hour	None	None	Brisk pace	1	2	0	2	2	3	60	7	Often/always	69	128	141	76	79	88	124	80	70	72	1.72	68.6	23.1882	1.2	2.97	4.42	0.56	4.8	70.5917	57.3529	73.6562	19289.3	19.2893	CatIV	6	3
1015-0071-NHC	Malay	Male	27	(20,30]	Yes	1	14	Sedentary job	Some but less than 1 hour	Some but less than 1 hour	Some but less than 1 hour	None	Some but less than 1 hour	Steady average pace	1	1	0	2	1	3	90	5	Often/always	76.3	137.7	144.8	86.24	73	89	125	80	60	77	1.68	61.6	21.83	1.26	3.11	4.68	0.68	4.8	62.2329	51.1831	70.3148	10842.2	10.8422	CatIII	7	5
1015-0076-NHC	Chinese	Male	53	(50,60]	No	NA	NA	Sedentary job	None	None	Some but less than 1 hour	None	None	Steady average pace	1	0	0	2	0	1	90	6	Often/always	70	115	102	78.3	91	100	152	101	52	71	1.67	68.9	24.71	1.35	3.77	5.84	1.58	5.3	63.3307	55.2083	68	14642	14.642	CatIII	5	3
1015-0082-NHC	Chinese	Female	63	(60,70]	No	NA	NA	Active job	None	None	1 hour but less than 3 hours	None	None	Slow	2	0	0	3	1	NA	NA	6	Never/hardly	55.8	108.5	97.2	65	73	90	133	77	56	75	1.62	47.9	18.25	2	4.04	6.38	0.76	5.1	67.1884	57	74.68	6682	6.682	CatII	3	3
1016-0005-NHC	Chinese	Female	25	(20,30]	No	NA	NA	Sedentary job	Some but less than 1 hour	1 hour but less than 3 hours	3 hours or more	None	None	Steady average pace	3	1	0	2	1	NA	NA	7	Never/hardly	70	115	NA	61.1	63	82	100	49	73	95	1.66	54.7	19.85	1.63	5.41	7.29	0.55	4.6	83.7129	73.8644	90.0784	6812	6.812	CatII	6	5
1016-0023-NHC	Chinese	Female	53	(50,60]	No	NA	NA	Sedentary job	None	None	3 hours or more	3 hours or more	None	Steady average pace	3	0	3	2	0	3	20	5	Never/hardly	50.9	113	NA	73.5	74	96	155	63	63	69	1.54	54.4	22.94	2.3	3.39	5.98	0.65	4.9	78.5444	68.2857	83.8043	7025.8	7.0258	CatII	6	5
1016-0028-NHC	Chinese	Female	50	(40,50]	No	NA	NA	Sedentary job	Some but less than 1 hour	None	3 hours or more	1 hour but less than 3 hours	None	Steady average pace	3	1	2	2	1	3	45	6	Often/always	60.4	120	NA	77.4	82	104	111	56	61	68	1.66	72	26.13	1.61	4.28	6.96	2.35	5.4	68.564	62.9792	70	11967	11.967	CatIII	5	4
1016-0041-NHC	Other	Female	25	(20,30]	No	NA	NA	Active job	Some but less than 1 hour	None	3 hours or more	1 hour but less than 3 hours	None	Brisk pace	3	1	2	3	2	1	60	7	Never/hardly	54	110	NA	62	75	99	117	65	75	64	1.52	63.3	27.4	1.37	2.07	3.67	0.51	5.3	74.358	65.8714	87.175	10688	10.688	CatIII	3	2
1016-0060-NHC	Chinese	Female	58	(50,60]	No	NA	NA	Active job	1 hour but less than 3 hours	None	Some but less than 1 hour	3 hours or more	Some but less than 1 hour	Brisk pace	1	2	3	3	3	1	60	7	Often/always	56	120	NA	71.5	92	103	111	55	70	67	1.55	65.9	27.43	1.39	3.35	5.43	1.52	5.9	71.029	61.9048	77.0145	10573.7	10.5737	CatIII	7	6
1016-0078-NHC	Chinese	Male	25	(20,30]	No	NA	NA	Active job	3 hours or more	None	1 hour but less than 3 hours	Some but less than 1 hour	None	Brisk pace	2	3	1	3	3	4	120	5	Often/always	118	223	NA	128	78	93	134	73	47	54	1.73	70.5	23.56	1.42	2.99	4.87	1.01	5.5	54.148	47.4681	58.8182	21042.5	21.0425	CatIV	6	4
1115-0037-NHC	Malay	Male	26	(20,30]	Yes	1	15	Highly active job	3 hours or more	None	1 hour but less than 3 hours	Some but less than 1 hour	Some but less than 1 hour	Steady average pace	2	3	1	4	3	2	45	5	Often/always	98.4	158.7	153.2	89.1	81	90	159	91	70	80	1.78	79.1	24.97	1.06	2.88	4.39	1	4.9	75.7885	71.275	71.4118	13161	13.161	CatIII	5	3
1116-0001-NHC	Chinese	Female	42	(40,50]	No	NA	NA	Sedentary job	3 hours or more	None	3 hours or more	None	None	Steady average pace	3	3	0	2	3	2	120	5	Often/always	60.1	119.2	NA	71.6	70	91	117	71	61	64	1.58	50.4	20.19	1.59	3.08	4.88	0.46	5.4	64.5299	58.4167	67.902	13772	13.772	CatIII	7	6
1116-0013-NHC	Chinese	Male	53	(50,60]	No	NA	NA	Not employed	None	Some but less than 1 hour	3 hours or more	Some but less than 1 hour	Some but less than 1 hour	Fast	3	0	1	1	0	5	40	7	Never/hardly	55	118	128	79	78	90	126	71	55	58	1.7	57.4	19.86	1.43	2.89	4.67	0.77	5.8	64.1679	56.9167	69.1081	8255	8.255	CatII	4	3
1116-0021-NHC	Chinese	Female	49	(40,50]	No	NA	NA	Active job	1 hour but less than 3 hours	None	Some but less than 1 hour	None	None	Steady average pace	1	2	0	3	3	5	120	6	Often/always	63	135.5	NA	85	73	84	102	64	66	65	1.54	53.7	22.64	2.19	3.09	5.54	0.58	5.2	82.7811	76.4857	95.4324	2979.67	2.97967	CatI	4	3
1116-0027-NHC	Chinese	Female	49	(40,50]	No	NA	NA	Sedentary job	None	None	3 hours or more	None	None	Steady average pace	3	0	0	2	0	6	30	6	Often/always	49	90.4	NA	49.8	69	86	112	76	68	93	1.56	47.8	19.64	1.46	3.35	5.35	1.18	4.9	79.7472	69.0625	83.0625	10395.3	10.3953	CatII	6	3
1116-0034-NHC	Chinese	Female	48	(40,50]	No	NA	NA	Sedentary job	3 hours or more	None	3 hours or more	3 hours or more	None	Fast	3	3	3	2	3	7	60	7	Often/always	57	115	NA	69	69	90	118	76	56	61	1.58	54.5	21.83	1.54	2.68	4.54	0.7	4.3	67.9262	58.8333	70.4286	11713.3	11.7133	CatIII	4	3
1116-0045-NHC	Chinese	Female	26	(20,30]	No	NA	NA	Sedentary job	None	None	1 hour but less than 3 hours	Some but less than 1 hour	None	Steady average pace	2	0	1	2	0	1	60	4	Never/hardly	49.8	88.8	NA	50.5	71	89	106	72	60	73	1.55	44.9	18.69	1.95	3.31	5.71	1	4.6	67.4005	59.7606	72.0789	10877	10.877	CatIII	6	5
1116-0047-NHC	Chinese	Female	52	(50,60]	No	NA	NA	Not employed	None	None	3 hours or more	None	None	Steady average pace	3	0	0	1	0	5	60	7	Often/always	38.7	110.1	NA	73.1	66	90	104	49	63	62	1.56	48.5	19.93	1.69	2.25	4.24	0.67	5.4	70.8261	62.5667	73.5	9857.4	9.8574	CatII	6	5
1116-0050-NHC	Indian	Female	30	(20,30]	No	NA	NA	Active job	1 hour but less than 3 hours	None	1 hour but less than 3 hours	1 hour but less than 3 hours	None	Steady average pace	2	2	2	3	3	1	60	8	Never/hardly	49.5	93.1	NA	52	61	95	118	73	86	88	1.62	50.9	19.39	1.41	3.34	5.11	0.79	4.9	82.7185	75.1875	83.2424	10064.8	10.0648	CatII	5	4
1116-0051-NHC	Chinese	Female	32	(30,40]	No	NA	NA	Sedentary job	1 hour but less than 3 hours	None	3 hours or more	None	Some but less than 1 hour	Steady average pace	3	2	0	2	2	2	30	6	Never/hardly	64.18	102.7	NA	68.53	67	88	113	70	62	62	1.56	49	20.13	1.38	2.32	4	0.67	5.2	63.7863	56.7083	66.24	12123.8	12.1238	CatIII	7	5
1116-0075-NHC	Chinese	Male	42	(40,50]	No	NA	NA	Sedentary job	3 hours or more	None	1 hour but less than 3 hours	Some but less than 1 hour	None	Steady average pace	2	3	1	2	3	3	50	7	Often/always	95.5	146.2	NA	86.13	72	93	124	83	49	70	1.7	65.2	22.56	1.22	3.48	5.32	1.37	5.3	59.4106	52.6232	77.2381	11524	11.524	CatIII	6	6
1116-0077-NHC	Indian	Male	36	(30,40]	No	NA	NA	Sedentary job	1 hour but less than 3 hours	None	Some but less than 1 hour	1 hour but less than 3 hours	None	Steady average pace	1	2	2	2	2	NA	NA	6	Never/hardly	79.1	140.4	NA	71.7	112	125	123	71	78	90	1.75	107.8	35.2	1.02	5.11	6.55	0.92	5.3	77.7959	72.7083	82.3704	15557	15.557	CatIII	4	3
1214-0043-NHC	Chinese	Female	52	(50,60]	No	NA	NA	Not employed	3 hours or more	None	3 hours or more	None	None	Brisk pace	3	3	0	1	3	7	120	NA	Often/always	54.6	92.2	99.7	64	65	83	102	61	58	63	1.64	46.1	17.1401	1.8	2.82	4.96	0.74	5.9	63.9073	78.6667	52.6167	24772.5	24.7725	CatIV	5	4
1214-0044-NHC	Chinese	Male	54	(50,60]	No	NA	NA	Sedentary job	3 hours or more	None	3 hours or more	None	None	Fast	3	3	0	2	3	3	30	7	Often/always	67.1	105.8	110.3	50.6	84	95	146	89	80	104	1.69	59.5	20.8326	1.3	4.23	6.17	1.42	5.6	72.9879	64.8167	93.4	12645.8	12.6457	CatIII	5	4
1215-0013-NHC	Chinese	Female	53	(50,60]	No	NA	NA	Active job	None	None	3 hours or more	None	None	Steady average pace	3	0	0	3	1	3	20	8	Often/always	62.5	82.6	78.4	49.24	83	91	166	100	79	79	1.51	51.3	22.5	1.2	3.02	4.84	1.37	6	79.5079	74.3457	88.6129	7467.67	7.46767	CatII	7	6
1215-0020-NHC	Chinese	Female	57	(50,60]	No	NA	NA	Sedentary job	None	None	1 hour but less than 3 hours	Some but less than 1 hour	None	Fast	2	0	1	2	0	3	30	7	Often/always	60.4	92.4	77.8	66	72	86	108	60	65	75	1.63	49.8	18.7436	1.78	4.84	7.16	1.2	5.3	77.7407	58.25	83.0303	10041.7	10.0417	CatII	5	3
1216-0009-NHC	Chinese	Female	35	(30,40]	No	NA	NA	Sedentary job	1 hour but less than 3 hours	None	1 hour but less than 3 hours	3 hours or more	None	Steady average pace	2	2	3	2	2	4	45	6	Often/always	54.6	125.9	NA	70.2	70	89	115	69	75	72	1.64	52.9	19.67	2.14	4.5	6.91	0.59	5.5	69.606	58.6042	72.6905	13275.5	13.2755	CatIII	6	4
1216-0012-NHC	Chinese	Male	48	(40,50]	No	NA	NA	Active job	1 hour but less than 3 hours	None	3 hours or more	3 hours or more	Some but less than 1 hour	Steady average pace	3	2	3	3	3	1	120	7	Often/always	110	161.3	NA	89.3	99	104	134	85	48	67	1.73	85.8	28.67	0.94	2.75	4.44	1.65	6.5	66.6076	58.1522	73.4706	12609.7	12.6097	CatIII	5	3
1216-0014-NHC	Chinese	Female	64	(60,70]	No	NA	NA	Not employed	3 hours or more	None	3 hours or more	3 hours or more	3 hours or more	Brisk pace	3	3	3	1	3	7	60	9	Often/always	65	114	NA	70	86	99	125	68	61	79	1.62	58	22.1	1.79	3.9	6.23	1.19	5	67.1074	58.75	74.8947	25164.5	25.1645	CatIV	4	2
1216-0025-NHC	Chinese	Female	42	(40,50]	No	NA	NA	Sedentary job	None	Some but less than 1 hour	Some but less than 1 hour	Some but less than 1 hour	None	Steady average pace	1	0	1	2	0	2	15	8	Never/hardly	59.3	102.5	NA	68.2	74	86	118	81	57	73	1.68	55.5	19.66	1.46	1.99	3.68	0.5	4.8	66.082	53.8472	69.2785	4146.67	4.14667	CatI	4	3
1216-0030-NHC	Chinese	Male	45	(40,50]	No	1	10	Sedentary job	3 hours or more	None	1 hour but less than 3 hours	None	None	Steady average pace	2	3	0	2	3	3	90	8	Often/always	99.9	170.9	NA	99.9	88	102	109	87	53	75	1.84	84.5	24.96	1.06	2.45	3.94	0.95	5.2	57.9685	50.4167	62.5	8762.25	8.76225	CatII	6	4
1216-0031-NHC	Chinese	Female	45	(40,50]	No	NA	NA	Sedentary job	None	None	3 hours or more	1 hour but less than 3 hours	None	Steady average pace	3	0	2	2	0	NA	NA	8	Never/hardly	56.7	115.4	NA	66.8	74	94	103	69	66	71	1.63	59.4	22.36	1.69	2.58	4.53	0.57	4.9	74.0551	65.6	81.4762	9235.75	9.23575	CatII	6	4
1216-0033-NHC	Chinese	Female	48	(40,50]	No	NA	NA	Sedentary job	None	None	Some but less than 1 hour	None	None	Slow	1	0	0	2	0	2	45	6	Often/always	79.5	113	NA	79.46	73	86	147	72	65	83	1.6	54.1	21.13	1.84	2.99	5.09	0.58	5.3	69.7874	60.2	72.9074	14069.5	14.0695	CatIII	6	4
1216-0064-NHC	Chinese	Female	60	(50,60]	No	NA	NA	Active job	Some but less than 1 hour	Some but less than 1 hour	1 hour but less than 3 hours	3 hours or more	1 hour but less than 3 hours	Steady average pace	2	1	3	3	2	7	60	7	Often/always	77	82	NA	50	73	83	135	83	65	77	1.45	43.5	20.69	1.66	3.93	6.13	1.18	4.7	70.6777	61.9492	98.4	17577.8	17.5778	CatIV	5	4
1216-0070-NHC	Chinese	Female	54	(50,60]	No	NA	NA	Sedentary job	Some but less than 1 hour	1 hour but less than 3 hours	3 hours or more	3 hours or more	None	Steady average pace	3	1	3	2	1	4	20	6	Never/hardly	68.3	108.7	NA	75.49	80	97	127	75	52	59	1.49	59.4	26.76	1.17	3.45	5	0.83	5.4	57.9061	52.75	57.8491	6701.75	6.70175	CatII	6	4
1216-0073-NHC	Chinese	Male	23	(20,30]	No	NA	NA	Sedentary job	3 hours or more	None	3 hours or more	3 hours or more	None	Steady average pace	3	3	3	2	3	2	240	9	Often/always	85.3	135.7	NA	79.18	77	95	126	79	50	73	1.76	63.3	20.44	1.34	3.29	5.13	1.1	5	68.9727	62.2444	75	8513	8.513	CatII	5	4
1216-0079-NHC	Chinese	Female	56	(50,60]	No	NA	NA	Sedentary job	3 hours or more	None	3 hours or more	1 hour but less than 3 hours	1 hour but less than 3 hours	Brisk pace	3	3	2	2	3	3	75	8	Often/always	60.4	94.1	NA	51	76	92	120	81	70	73	1.59	55.7	22.03	1.94	4.35	7.18	1.96	5.3	88.3596	83.9722	93.5	10855	10.855	CatIII	4	3
[truncated: 13 more columns]
